# Supplementary material for: Beyond the Colours: Discovering Hidden Diversity in the Nymphalidae of the Yucatan Peninsula in Mexico through DNA Barcoding
Source: PLoS One. 2011 Nov 23;6(11):e27776. doi: 10.1371/journal.pone.0027776 (PMC3223209; doi:10.1371/journal.pone.0027776)
Supplement: Table S2 — GenBank accession numbers for specimens in the “Nymphalidae of the Yucatan Peninsula” project. (XLS) [file pone.0027776.s002.xls]

## Sheet: Hoja1
Identification	Sample ID	Museum ID	Processid	Institution Storing	Country/Ocean	State/Province	GPS	Images	GenBank
Adelpha barnesia	MAL-02365	L-24110	LYPIE741-09	El Colegio de la Frontera Sur	Mexico	Campeche	Yes	1	GU660171
Adelpha barnesia	MAL-02364	L-21428	LYPIE740-09	El Colegio de la Frontera Sur	Mexico	Campeche	Yes	1	GU660170
Adelpha barnesia	MAL-02363	L-19028	LYPIE739-09	El Colegio de la Frontera Sur	Mexico	Campeche	Yes	1	GU660169
Adelpha basiloidesECO01	MAL-02370	L-37647	LYPIE746-09	El Colegio de la Frontera Sur	Mexico	Campeche	Yes	1	GU660168
Adelpha basiloidesECO02	MAL-02375	L-29846	LYPIE751-09	El Colegio de la Frontera Sur	Mexico	Campeche	Yes	1	GU660157
Adelpha basiloidesECO02	MAL-02374	L-24459	LYPIE750-09	El Colegio de la Frontera Sur	Mexico	Campeche	Yes	1	GU660164
Adelpha basiloidesECO02	MAL-02373	L-47016	LYPIE749-09	El Colegio de la Frontera Sur	Mexico	Campeche	Yes	1	GU660163
Adelpha basiloidesECO02	MAL-02372	L-34042	LYPIE748-09	El Colegio de la Frontera Sur	Mexico	Quintana Roo	Yes	1	GU660162
Adelpha basiloidesECO02	MAL-02371	L-34047	LYPIE747-09	El Colegio de la Frontera Sur	Mexico	Quintana Roo	Yes	1	GU660161
Adelpha basiloidesECO02	MAL-02369	L-87961	LYPIE745-09	El Colegio de la Frontera Sur	Mexico	Yucatan	Yes	1	GU660167
Adelpha basiloidesECO02	MAL-02368	L-87962	LYPIE744-09	El Colegio de la Frontera Sur	Mexico	Yucatan	Yes	1	GU660166
Adelpha fessonia	MAL-02384	L-24965	LYPIE760-09	El Colegio de la Frontera Sur	Mexico	Campeche	Yes	1	HM388603
Adelpha fessonia	MAL-02383	L-43786	LYPIE759-09	El Colegio de la Frontera Sur	Mexico	Quintana Roo	Yes	1	HM388602
Adelpha fessonia	MAL-02382	L-55732	LYPIE758-09	El Colegio de la Frontera Sur	Mexico	Campeche	Yes	1	HM388601
Adelpha fessonia	MAL-02381	L-17540	LYPIE757-09	El Colegio de la Frontera Sur	Mexico	Campeche	Yes	1	HM388600
Adelpha fessonia	MAL-02380	L-59541	LYPIE756-09	El Colegio de la Frontera Sur	Mexico	Quintana Roo	Yes	1	JN201239
Adelpha fessonia	MAL-02379	L-71304	LYPIE755-09	El Colegio de la Frontera Sur	Mexico	Yucatan	Yes	1	JN201240
Adelpha fessonia	MAL-02378	L-61925	LYPIE754-09	El Colegio de la Frontera Sur	Mexico	Campeche	Yes	1	JN201241
Adelpha fessonia	MAL-02377	L-87951	LYPIE753-09	El Colegio de la Frontera Sur	Mexico	Yucatan	Yes	1	JN201242
Adelpha fessonia	MAL-02376	L-87945	LYPIE752-09	El Colegio de la Frontera Sur	Mexico	Yucatan	Yes	1	GU660158
Adelpha iphicleola	MAL-02390	L-26772	LYPIE766-09	El Colegio de la Frontera Sur	Mexico	Campeche	Yes	1	HM388609
Adelpha iphicleola	MAL-02389	L-34046	LYPIE765-09	El Colegio de la Frontera Sur	Mexico	Quintana Roo	Yes	1	HM388608
Adelpha iphicleola	MAL-02388	L-23513	LYPIE764-09	El Colegio de la Frontera Sur	Mexico	Campeche	Yes	1	HM388607
Adelpha iphicleola	MAL-02387	L-32935	LYPIE763-09	El Colegio de la Frontera Sur	Mexico	Campeche	Yes	1	HM388606
Adelpha iphicleola	MAL-02386	L-20405	LYPIE762-09	El Colegio de la Frontera Sur	Mexico	Quintana Roo	Yes	1	HM388605
Adelpha iphicleola	MAL-02385	L-21190	LYPIE761-09	El Colegio de la Frontera Sur	Mexico	Quintana Roo	Yes	1	HM388604
Adelpha iphiclus	MAL-02402	L-01721	LYPIE778-09	El Colegio de la Frontera Sur	Mexico	Quintana Roo	Yes	1	JN201243
Adelpha iphiclus	MAL-02401	L-24362	LYPIE777-09	El Colegio de la Frontera Sur	Mexico	Campeche	Yes	1	HM388617
Adelpha iphiclus	MAL-02400	L-22013	LYPIE776-09	El Colegio de la Frontera Sur	Mexico	Campeche	Yes	1	HM388616
Adelpha malea	MAL-02367	L-50819	LYPIE743-09	El Colegio de la Frontera Sur	Mexico	Campeche	Yes	1	GU660165
Adelpha malea	MAL-02366	L-06159	LYPIE742-09	El Colegio de la Frontera Sur	Mexico	Campeche	Yes	1	GU660172
Adelpha naxia	MAL-02397	L-87923	LYPIE773-09	El Colegio de la Frontera Sur	Mexico	Yucatan	Yes	1	HM388614
Adelpha naxia	MAL-02396	L-87930	LYPIE772-09	El Colegio de la Frontera Sur	Mexico	Yucatan	Yes	1	HM388613
Adelpha naxia	MAL-02395	L-25311	LYPIE771-09	El Colegio de la Frontera Sur	Mexico	Campeche	Yes	1	HM388612
Adelpha naxia	MAL-02394	L-22341	LYPIE770-09	El Colegio de la Frontera Sur	Mexico	Campeche	Yes	1	HM388611
Adelpha naxia	MAL-02392	L-12812	LYPIE768-09	El Colegio de la Frontera Sur	Mexico	Campeche	Yes	1	JN201244
Adelpha naxia	MAL-02391	L-50820	LYPIE767-09	El Colegio de la Frontera Sur	Mexico	Campeche	Yes	1	HM388610
Adelpha phylaca	MAL-02398	L-08816	LYPIE774-09	El Colegio de la Frontera Sur	Mexico	Campeche	Yes	1	HM890822
Adelpha serpa	MAL-02399	L-66188	LYPIE775-09	El Colegio de la Frontera Sur	Mexico	Campeche	Yes	1	HM388615
Agraulis vanillae	MAL-02411	L-03356	LYPIE787-09	El Colegio de la Frontera Sur	Mexico	Quintana Roo	Yes	1	JN201245
Agraulis vanillae	MAL-02410	L-28622	LYPIE786-09	El Colegio de la Frontera Sur	Mexico	Campeche	Yes	1	HM388624
Agraulis vanillae	MAL-02409	L-28628	LYPIE785-09	El Colegio de la Frontera Sur	Mexico	Campeche	Yes	1	HM388623
Agraulis vanillae	MAL-02408	L-40200	LYPIE784-09	El Colegio de la Frontera Sur	Mexico	Campeche	Yes	1	HM388622
Agraulis vanillae	MAL-02407	L-31943	LYPIE783-09	El Colegio de la Frontera Sur	Mexico	Campeche	Yes	1	JN201246
Agraulis vanillae	MAL-02406	L-50810	LYPIE782-09	El Colegio de la Frontera Sur	Mexico	Campeche	Yes	1	HM388621
Agraulis vanillae	MAL-02405	L-72382	LYPIE781-09	El Colegio de la Frontera Sur	Mexico	Yucatan	Yes	1	HM388620
Agraulis vanillae	MAL-02404	L-71926	LYPIE780-09	El Colegio de la Frontera Sur	Mexico	Yucatan	Yes	1	HM388619
Agraulis vanillae	MAL-02403	L-70141	LYPIE779-09	El Colegio de la Frontera Sur	Mexico	Yucatan	Yes	1	HM388618
Anaea troglodyta	MAL-02418	L-74039	LYPIE794-09	El Colegio de la Frontera Sur	Mexico	Yucatan	Yes	1	HM388630
Anaea troglodyta	MAL-02417	L-70793	LYPIE793-09	El Colegio de la Frontera Sur	Mexico	Yucatan	Yes	1	HM388629
Anaea troglodyta	MAL-02416	L-30741	LYPIE792-09	El Colegio de la Frontera Sur	Mexico	Campeche	Yes	1	HM388628
Anaea troglodyta	MAL-02415	L-29869	LYPIE791-09	El Colegio de la Frontera Sur	Mexico	Campeche	Yes	1	HM388627
Anaea troglodyta	MAL-02414	L-25003	LYPIE790-09	El Colegio de la Frontera Sur	Mexico	Campeche	Yes	1	HM388626
Anaea troglodyta	MAL-02413	L-44535	LYPIE789-09	El Colegio de la Frontera Sur	Mexico	Campeche	Yes	1	HM388625
Anaea troglodyta	MAL-02412	L-20154	LYPIE788-09	El Colegio de la Frontera Sur	Mexico	Quintana Roo	Yes	1	JN201247
Anartia fatima	MAL-02444	L-86723	LYPIE820-09	El Colegio de la Frontera Sur	Mexico	Yucatan	Yes	1	HM388654
Anartia fatima	MAL-02443	L-86656	LYPIE819-09	El Colegio de la Frontera Sur	Mexico	Yucatan	Yes	1	HM388653
Anartia fatima	MAL-02442	L-86741	LYPIE818-09	El Colegio de la Frontera Sur	Mexico	Yucatan	Yes	1	HM388652
Anartia fatima	MAL-02424	L-73369	LYPIE800-09	El Colegio de la Frontera Sur	Mexico	Yucatan	Yes	1	HM388636
Anartia fatima	MAL-02423	L-28407	LYPIE799-09	El Colegio de la Frontera Sur	Mexico	Campeche	Yes	1	HM388635
Anartia fatima	MAL-02422	L-24642	LYPIE798-09	El Colegio de la Frontera Sur	Mexico	Campeche	Yes	1	HM388634
Anartia fatima	MAL-02421	L-28419	LYPIE797-09	El Colegio de la Frontera Sur	Mexico	Campeche	Yes	1	HM388633
Anartia fatima	MAL-02420	L-28447	LYPIE796-09	El Colegio de la Frontera Sur	Mexico	Campeche	Yes	1	HM388632
Anartia fatima	MAL-02419	L-40633	LYPIE795-09	El Colegio de la Frontera Sur	Mexico	Campeche	Yes	1	HM388631
Anartia jatrophae	MAL-02436	L-72436	LYPIE812-09	El Colegio de la Frontera Sur	Mexico	Yucatan	Yes	1	HM388648
Anartia jatrophae	MAL-02435	L-74491	LYPIE811-09	El Colegio de la Frontera Sur	Mexico	Yucatan	Yes	1	HM388647
Anartia jatrophae	MAL-02434	L-03043	LYPIE810-09	El Colegio de la Frontera Sur	Mexico	Quintana Roo	Yes	1	HM388646
Anartia jatrophae	MAL-02433	L-05022	LYPIE809-09	El Colegio de la Frontera Sur	Mexico	Quintana Roo	Yes	1	HM388645
Anartia jatrophae	MAL-02432	L-28466	LYPIE808-09	El Colegio de la Frontera Sur	Mexico	Campeche	Yes	1	HM388644
Anartia jatrophae	MAL-02431	L-40643	LYPIE807-09	El Colegio de la Frontera Sur	Mexico	Campeche	Yes	1	HM388643
Anartia jatrophae	MAL-02430	L-43906	LYPIE806-09	El Colegio de la Frontera Sur	Mexico	Quintana Roo	Yes	1	HM388642
Anartia jatrophae	MAL-02429	L-59362	LYPIE805-09	El Colegio de la Frontera Sur	Mexico	Quintana Roo	Yes	1	HM388641
Anartia jatrophae	MAL-02428	L-68409	LYPIE804-09	El Colegio de la Frontera Sur	Mexico	Quintana Roo	Yes	1	HM388640
Anartia jatrophae	MAL-02427	L-86747	LYPIE803-09	El Colegio de la Frontera Sur	Mexico	Yucatan	Yes	1	HM388639
Anartia jatrophae	MAL-02426	L-86771	LYPIE802-09	El Colegio de la Frontera Sur	Mexico	Yucatan	Yes	1	HM388638
Anartia jatrophae	MAL-02425	L-86762	LYPIE801-09	El Colegio de la Frontera Sur	Mexico	Yucatan	Yes	1	HM388637
Anthanassa argentea	MAL-02441	L-22087	LYPIE817-09	El Colegio de la Frontera Sur	Mexico	Campeche	Yes	1	HM890823
Anthanassa frisia	MAL-02450	L-74124	LYPIE826-09	El Colegio de la Frontera Sur	Mexico	Yucatan	Yes	1	HM388660
Anthanassa frisia	MAL-02449	L-73179	LYPIE825-09	El Colegio de la Frontera Sur	Mexico	Yucatan	Yes	1	HM388659
Anthanassa frisia	MAL-02448	L-23175	LYPIE824-09	El Colegio de la Frontera Sur	Mexico	Campeche	Yes	1	HM388658
Anthanassa frisia	MAL-02447	L-87545	LYPIE823-09	El Colegio de la Frontera Sur	Mexico	Yucatan	Yes	1	HM388657
Anthanassa frisia	MAL-02446	L-87541	LYPIE822-09	El Colegio de la Frontera Sur	Mexico	Yucatan	Yes	1	HM388656
Anthanassa frisia	MAL-02445	L-76987	LYPIE821-09	El Colegio de la Frontera Sur	Mexico	Campeche	Yes	1	HM388655
Anthanassa frisia	MAL-02440	L-30066	LYPIE816-09	El Colegio de la Frontera Sur	Mexico	Campeche	Yes	1	HM388651
Anthanassa frisia	MAL-02439	L-30065	LYPIE815-09	El Colegio de la Frontera Sur	Mexico	Campeche	Yes	1	HM388650
Anthanassa frisia	MAL-02438	L-30061	LYPIE814-09	El Colegio de la Frontera Sur	Mexico	Campeche	Yes	1	HM388649
Archaeoprepona demophon	MAL-02456	L-73722	LYPIE832-09	El Colegio de la Frontera Sur	Mexico	Yucatan	Yes	1	HM388665
Archaeoprepona demophon	MAL-02455	L-77185	LYPIE831-09	El Colegio de la Frontera Sur	Mexico	Quintana Roo	Yes	1	HM388664
Archaeoprepona demophon	MAL-02454	L-18833	LYPIE830-09	El Colegio de la Frontera Sur	Mexico	Quintana Roo	Yes	1	JN201248
Archaeoprepona demophon	MAL-02453	L-27881	LYPIE829-09	El Colegio de la Frontera Sur	Mexico	Campeche	Yes	1	HM388663
Archaeoprepona demophon	MAL-02452	L-27892	LYPIE828-09	El Colegio de la Frontera Sur	Mexico	Campeche	Yes	1	HM388662
Archaeoprepona demophon	MAL-02451	L-40831	LYPIE827-09	El Colegio de la Frontera Sur	Mexico	Campeche	Yes	1	HM388661
Archaeoprepona demophoon	MLL-02201	DNA-02132	LYRIO097-09	El Colegio de la Frontera Sur	Mexico	Campeche	Yes	2	HM388697
Archaeoprepona demophoon	MAL-02465	L-68972	LYPIE841-09	El Colegio de la Frontera Sur	Mexico	Quintana Roo	Yes	1	HM388674
Archaeoprepona demophoon	MAL-02464	L-42191	LYPIE840-09	El Colegio de la Frontera Sur	Mexico	Campeche	Yes	1	HM388673
Archaeoprepona demophoon	MAL-02463	L-27896	LYPIE839-09	El Colegio de la Frontera Sur	Mexico	Campeche	Yes	1	HM388672
Archaeoprepona demophoon	MAL-02462	L-27902	LYPIE838-09	El Colegio de la Frontera Sur	Mexico	Campeche	Yes	1	HM388671
Archaeoprepona demophoon	MAL-02461	L-27921	LYPIE837-09	El Colegio de la Frontera Sur	Mexico	Campeche	Yes	1	HM388670
Archaeoprepona demophoon	MAL-02460	L-75768	LYPIE836-09	El Colegio de la Frontera Sur	Mexico	Quintana Roo	Yes	1	HM388669
Archaeoprepona demophoon	MAL-02459	L-33936	LYPIE835-09	El Colegio de la Frontera Sur	Mexico	Quintana Roo	Yes	1	HM388668
Archaeoprepona demophoon	MAL-02458	L-34800	LYPIE834-09	El Colegio de la Frontera Sur	Mexico	Quintana Roo	Yes	1	HM388667
Archaeoprepona demophoon	MAL-02457	L-36581	LYPIE833-09	El Colegio de la Frontera Sur	Mexico	Campeche	Yes	1	HM388666
Archaeoprepona meander	MAL-02466	L-43064	LYPIE842-09	El Colegio de la Frontera Sur	Mexico	Campeche	Yes	1	HM388675
Asterocampa idyjaECO01	MAL-02471	L-45708	LYPAP095-09	El Colegio de la Frontera Sur	Mexico	Campeche	Yes	1	GU659965
Asterocampa idyjaECO01	MAL-02468	L-44442	LYPIE844-09	El Colegio de la Frontera Sur	Mexico	Campeche	Yes	1	HM388677
Asterocampa idyjaECO02	MAL-02472	L-40447	LYPAP096-09	El Colegio de la Frontera Sur	Mexico	Campeche	Yes	1	GU659959
Asterocampa idyjaECO02	MAL-02470	L-23161	LYPIE846-09	El Colegio de la Frontera Sur	Mexico	Campeche	Yes	1	HM388679
Asterocampa idyjaECO02	MAL-02469	L-47157	LYPIE845-09	El Colegio de la Frontera Sur	Mexico	Campeche	Yes	1	HM388678
Asterocampa idyjaECO02	MAL-02467	L-29433	LYPIE843-09	El Colegio de la Frontera Sur	Mexico	Campeche	Yes	1	HM388676
Biblis hyperiaECO01	MAL-02479	L-40210	LYPAP103-09	El Colegio de la Frontera Sur	Mexico	Campeche	Yes	1	GU659958
Biblis hyperiaECO02	MAL-02482	L-87067	LYPAP106-09	El Colegio de la Frontera Sur	Mexico	Yucatan	Yes	1	GU659953
Biblis hyperiaECO02	MAL-02481	L-86661	LYPAP105-09	El Colegio de la Frontera Sur	Mexico	Yucatan	Yes	1	GU659952
Biblis hyperiaECO02	MAL-02480	L-43781	LYPAP104-09	El Colegio de la Frontera Sur	Mexico	Quintana Roo	Yes	1	GU659951
Biblis hyperiaECO02	MAL-02478	L-28376	LYPAP102-09	El Colegio de la Frontera Sur	Mexico	Campeche	Yes	1	GU659957
Biblis hyperiaECO02	MAL-02477	L-28372	LYPAP101-09	El Colegio de la Frontera Sur	Mexico	Campeche	Yes	1	GU659956
Biblis hyperiaECO02	MAL-02476	L-65754	LYPAP100-09	El Colegio de la Frontera Sur	Mexico	Campeche	Yes	1	GU659955
Biblis hyperiaECO02	MAL-02475	L-02366	LYPAP099-09	El Colegio de la Frontera Sur	Mexico	Quintana Roo	Yes	1	GU659962
Biblis hyperiaECO02	MAL-02474	L-70547	LYPAP098-09	El Colegio de la Frontera Sur	Mexico	Yucatan	Yes	1	GU659961
Biblis hyperiaECO02	MAL-02473	L-71014	LYPAP097-09	El Colegio de la Frontera Sur	Mexico	Yucatan	Yes	1	GU659960
Biblis hyperiaECO02	MLL-02182	DNA-02240	LPYPC058-08	El Colegio de la Frontera Sur	Mexico	Yucatan	Yes	1	JN201249
Caligo telamonius	MAL-02487	L-28040	LYPAP111-09	El Colegio de la Frontera Sur	Mexico	Campeche	Yes	1	GU659949
Caligo telamonius	MAL-02486	L-22435	LYPAP110-09	El Colegio de la Frontera Sur	Mexico	Campeche	Yes	1	GU659948
Caligo telamonius	MAL-02485	L-43774	LYPAP109-09	El Colegio de la Frontera Sur	Mexico	Quintana Roo	Yes	1	HQ990155
Caligo telamonius	MAL-02484	L-58796	LYPAP108-09	El Colegio de la Frontera Sur	Mexico	Quintana Roo	Yes	1	GU659947
Caligo telamonius	MAL-02483	L-42131	LYPAP107-09	El Colegio de la Frontera Sur	Mexico	Campeche	Yes	1	GU659954
Caligo uranus	MAL-02492	L-28038	LYPAP116-09	El Colegio de la Frontera Sur	Mexico	Campeche	Yes	1	GU659945
Caligo uranus	MAL-02491	L-43075	LYPAP115-09	El Colegio de la Frontera Sur	Mexico	Campeche	Yes	1	GU659944
Caligo uranus	MAL-02490	L-26547	LYPAP114-09	El Colegio de la Frontera Sur	Mexico	Quintana Roo	Yes	1	GU659943
Caligo uranus	MAL-02489	L-01981	LYPAP113-09	El Colegio de la Frontera Sur	Mexico	Quintana Roo	Yes	1	HQ990156
Caligo uranus	MAL-02488	L-40839	LYPAP112-09	El Colegio de la Frontera Sur	Mexico	Campeche	Yes	1	GU659950
Callicore texa	MAL-02494	L-21549	LYPAP118-09	El Colegio de la Frontera Sur	Mexico	Campeche	Yes	1	GU659946
Callicore texa	MAL-02493	L-00639	LYPAP117-09	El Colegio de la Frontera Sur	Mexico	Quintana Roo	Yes	1	JN201250
Castilia myia	MAL-02500	L-76994	LYPAP124-09	El Colegio de la Frontera Sur	Mexico	Campeche	Yes	1	GU659936
Castilia myia	MAL-02499	L-24718	LYPAP123-09	El Colegio de la Frontera Sur	Mexico	Campeche	Yes	1	HQ990157
Castilia myia	MAL-02498	L-25741	LYPAP122-09	El Colegio de la Frontera Sur	Mexico	Campeche	Yes	1	GU659942
Castilia myia	MAL-02497	L-23176	LYPAP121-09	El Colegio de la Frontera Sur	Mexico	Campeche	Yes	1	GU659941
Castilia myia	MAL-02496	L-24272	LYPAP120-09	El Colegio de la Frontera Sur	Mexico	Campeche	Yes	1	GU659940
Castilia myia	MAL-02495	L-53127	LYPAP119-09	El Colegio de la Frontera Sur	Mexico	Campeche	Yes	1	GU659939
Castilia ofella	MAL-02501	L-30074	LYPAP125-09	El Colegio de la Frontera Sur	Mexico	Campeche	Yes	1	HM431610
Catonephele mexicana	MAL-02507	L-41008	LYPAP131-09	El Colegio de la Frontera Sur	Mexico	Campeche	Yes	1	GU659935
Catonephele mexicana	MAL-02506	L-40711	LYPAP130-09	El Colegio de la Frontera Sur	Mexico	Campeche	Yes	1	GU659934
Catonephele mexicana	MAL-02505	L-40710	LYPAP129-09	El Colegio de la Frontera Sur	Mexico	Campeche	Yes	1	GU659933
Catonephele mexicana	MAL-02504	L-41009	LYPAP128-09	El Colegio de la Frontera Sur	Mexico	Campeche	Yes	1	GU659932
Catonephele mexicana	MAL-02503	L-41010	LYPAP127-09	El Colegio de la Frontera Sur	Mexico	Campeche	Yes	1	GU659938
Catonephele mexicana	MAL-02502	L-13613	LYPAP126-09	El Colegio de la Frontera Sur	Mexico	Campeche	Yes	1	GU659937
Catonephele numilia	MAL-02514	L-08557	LYPAP138-09	El Colegio de la Frontera Sur	Mexico	Campeche	Yes	1	GU659926
Catonephele numilia	MAL-02513	L-21509	LYPAP137-09	El Colegio de la Frontera Sur	Mexico	Campeche	Yes	1	GU659925
Catonephele numilia	MAL-02512	L-21673	LYPAP136-09	El Colegio de la Frontera Sur	Mexico	Campeche	Yes	1	GU659924
Catonephele numilia	MAL-02511	L-07398	LYPAP135-09	El Colegio de la Frontera Sur	Mexico	Campeche	Yes	1	GU659931
Catonephele numilia	MAL-02510	L-21967	LYPAP134-09	El Colegio de la Frontera Sur	Mexico	Campeche	Yes	1	GU659930
Catonephele numilia	MAL-02509	L-42297	LYPAP133-09	El Colegio de la Frontera Sur	Mexico	Quintana Roo	Yes	1	GU659929
Catonephele numilia	MAL-02508	L-43157	LYPAP132-09	El Colegio de la Frontera Sur	Mexico	Campeche	Yes	1	GU659928
Cepheuptychia glaucina	MAL-02521	L-20340	LYPAP145-09	El Colegio de la Frontera Sur	Mexico	Quintana Roo	Yes	1	GU659917
Cepheuptychia glaucina	MAL-02520	L-86819	LYPAP144-09	El Colegio de la Frontera Sur	Mexico	Yucatan	Yes	1	GU659916
Cepheuptychia glaucina	MAL-02519	L-17181	LYPAP143-09	El Colegio de la Frontera Sur	Mexico	Campeche	Yes	1	GU659923
Cepheuptychia glaucina	MAL-02518	L-21143	LYPAP142-09	El Colegio de la Frontera Sur	Mexico	Quintana Roo	Yes	1	GU659922
Cepheuptychia glaucina	MAL-02517	L-42128	LYPAP141-09	El Colegio de la Frontera Sur	Mexico	Quintana Roo	Yes	1	GU659921
Cepheuptychia glaucina	MAL-02516	L-69996	LYPAP140-09	El Colegio de la Frontera Sur	Mexico	Quintana Roo	Yes	1	GU659920
Cepheuptychia glaucina	MAL-02515	L-43576	LYPAP139-09	El Colegio de la Frontera Sur	Mexico	Quintana Roo	Yes	1	GU659927
Chlosyne erodyle	MAL-02539	L-59398	LYPAP163-09	El Colegio de la Frontera Sur	Mexico	Quintana Roo	Yes	1	GU659900
Chlosyne erodyle	MAL-02538	L-59399	LYPAP162-09	El Colegio de la Frontera Sur	Mexico	Quintana Roo	Yes	1	GU659907
Chlosyne erodyle	MAL-02537	L-59147	LYPAP161-09	El Colegio de la Frontera Sur	Mexico	Quintana Roo	Yes	1	GU659906
Chlosyne erodyle	MAL-02527	L-42633	LYPAP151-09	El Colegio de la Frontera Sur	Mexico	Quintana Roo	Yes	1	GU659915
Chlosyne erodyle	MAL-02526	L-58915	LYPAP150-09	El Colegio de la Frontera Sur	Mexico	Quintana Roo	Yes	1	GU659914
Chlosyne erodyle	MAL-02525	L-40719	LYPAP149-09	El Colegio de la Frontera Sur	Mexico	Campeche	Yes	1	GU659913
Chlosyne erodyle	MAL-02524	L-86497	LYPAP148-09	El Colegio de la Frontera Sur	Mexico	Yucatan	Yes	1	GU659912
Chlosyne erodyle	MAL-02523	L-70825	LYPAP147-09	El Colegio de la Frontera Sur	Mexico	Yucatan	Yes	1	GU659919
Chlosyne erodyle	MAL-02522	L-71406	LYPAP146-09	El Colegio de la Frontera Sur	Mexico	Yucatan	Yes	1	GU659918
Chlosyne gaudialis	MAL-02532	L-42779	LYPAP156-09	El Colegio de la Frontera Sur	Mexico	Campeche	Yes	1	GU659904
Chlosyne gaudialis	MAL-02531	L-42075	LYPAP155-09	El Colegio de la Frontera Sur	Mexico	Campeche	Yes	1	GU659911
Chlosyne gaudialis	MAL-02530	L-42765	LYPAP154-09	El Colegio de la Frontera Sur	Mexico	Quintana Roo	Yes	1	GU659910
Chlosyne gaudialis	MAL-02529	L-22051	LYPAP153-09	El Colegio de la Frontera Sur	Mexico	Campeche	Yes	1	GU659909
Chlosyne gaudialis	MAL-02528	L-22095	LYPAP152-09	El Colegio de la Frontera Sur	Mexico	Campeche	Yes	1	GU659908
Chlosyne gaudialis	MLL-00937	DNA-00901	LPYPA595-08	El Colegio de la Frontera Sur	Mexico	Campeche	Yes	1	JN201251
Chlosyne gaudialis	MLL-00936	DNA-00900	LPYPA594-08	El Colegio de la Frontera Sur	Mexico	Campeche	Yes	1	JN201252
Chlosyne gaudialis	MLL-00935	DNA-00899	LPYPA593-08	El Colegio de la Frontera Sur	Mexico	Campeche	Yes	1	JN201253
Chlosyne gaudialis	MLL-00934	DNA-00898	LPYPA592-08	El Colegio de la Frontera Sur	Mexico	Campeche	Yes	1	JN201254
Chlosyne gaudialis	MLL-00932	DNA-00896	LPYPA590-08	El Colegio de la Frontera Sur	Mexico	Campeche	Yes	1	JN201255
Chlosyne gaudialis	MLL-01932	DNA-01987	LPYPA462-08	El Colegio de la Frontera Sur	Mexico	Campeche	Yes	1	JN201256
Chlosyne gaudialis	MLL-01478	DNA-01527	LPMX820-08	El Colegio de la Frontera Sur	Mexico	Campeche	Yes	1	JN201257
Chlosyne gaudialis	MLL-00361	DNA-00353	LPMX361-07	El Colegio de la Frontera Sur	Mexico	Campeche	Yes	3	JN201258
Chlosyne gaudialis	MLL-00358	DNA-00351	LPMX358-07	El Colegio de la Frontera Sur	Mexico	Campeche	Yes	3	JN201259
Chlosyne gaudialis	MLL-00356	DNA-00349	LPMX356-07	El Colegio de la Frontera Sur	Mexico	Campeche	Yes	3	JN201260
Chlosyne gaudialis	MLL-00355	DNA-00348	LPMX355-07	El Colegio de la Frontera Sur	Mexico	Campeche	Yes	3	JN201261
Chlosyne gaudialis	MLL-00354	DNA-00347	LPMX354-07	El Colegio de la Frontera Sur	Mexico	Campeche	Yes	3	JN201262
Chlosyne gaudialis	MLL-00149	DNA-00139	LPMX149-07	El Colegio de la Frontera Sur	Mexico	Campeche	Yes	1	JN201263
Chlosyne gaudialis	MLL-00148	DNA-00138	LPMX148-07	El Colegio de la Frontera Sur	Mexico	Campeche	Yes	1	JN201264
Chlosyne gaudialis	MLL-00147	DNA-00137	LPMX147-07	El Colegio de la Frontera Sur	Mexico	Campeche	Yes	1	JN201265
Chlosyne gaudialis	MLL-00146	DNA-00136	LPMX146-07	El Colegio de la Frontera Sur	Mexico	Campeche	Yes	1	JN201266
Chlosyne gaudialis	MLL-00145	DNA-00135	LPMX145-07	El Colegio de la Frontera Sur	Mexico	Campeche	Yes	1	JN201267
Chlosyne gaudialis	MLL-00144	DNA-00134	LPMX144-07	El Colegio de la Frontera Sur	Mexico	Campeche	Yes	1	JN201268
Chlosyne gaudialis	MLL-00141	DNA-00130	LPMX141-07	El Colegio de la Frontera Sur	Mexico	Campeche	Yes	1	JN201269
Chlosyne gaudialis	MLL-00140	DNA-00129	LPMX140-07	El Colegio de la Frontera Sur	Mexico	Campeche	Yes	1	JN201270
Chlosyne gaudialis	MLL-00039	DNA-00045	LPMX039-07	El Colegio de la Frontera Sur	Mexico	Campeche	Yes	1	JN201271
Chlosyne gaudialis	MLL-00028	DNA-00007	LPMX028-07	El Colegio de la Frontera Sur	Mexico	Campeche	Yes	1	JN201272
Chlosyne hippodrome	MAL-02533	L-00294	LYPAP157-09	El Colegio de la Frontera Sur	Mexico	Quintana Roo	Yes	1	JN201273
Chlosyne janais	MAL-02535	L-41144	LYPAP159-09	El Colegio de la Frontera Sur	Mexico	Campeche	Yes	1	GU659905
Chlosyne lacinia	MAL-02544	L-87173	LYPAP168-09	El Colegio de la Frontera Sur	Mexico	Yucatan	Yes	1	GU659896
Chlosyne lacinia	MAL-02543	L-62135	LYPAP167-09	El Colegio de la Frontera Sur	Mexico	Campeche	Yes	1	GU659903
Chlosyne lacinia	MAL-02542	L-87395	LYPAP166-09	El Colegio de la Frontera Sur	Mexico	Yucatan	Yes	1	GU659902
Chlosyne lacinia	MAL-02541	L-44704	LYPAP165-09	El Colegio de la Frontera Sur	Mexico	Campeche	Yes	1	HQ990159
Chlosyne lacinia	MAL-02540	L-38490	LYPAP164-09	El Colegio de la Frontera Sur	Mexico	Quintana Roo	Yes	1	GU659901
Chlosyne theona	MAL-02555	L-86592	LYPAP179-09	El Colegio de la Frontera Sur	Mexico	Yucatan	Yes	1	GU659890
Chlosyne theona	MAL-02554	L-87318	LYPAP178-09	El Colegio de la Frontera Sur	Mexico	Yucatan	Yes	1	GU659889
Chlosyne theona	MAL-02553	L-87308	LYPAP177-09	El Colegio de la Frontera Sur	Mexico	Yucatan	Yes	1	GU659888
Chlosyne theona	MAL-02552	L-86650	LYPAP176-09	El Colegio de la Frontera Sur	Mexico	Yucatan	Yes	1	GU659895
Chlosyne theona	MAL-02551	L-02671	LYPAP175-09	El Colegio de la Frontera Sur	Mexico	Quintana Roo	Yes	1	GU659894
Chlosyne theona	MAL-02550	L-40699	LYPAP174-09	El Colegio de la Frontera Sur	Mexico	Campeche	Yes	1	GU659893
Chlosyne theona	MAL-02549	L-56462	LYPAP173-09	El Colegio de la Frontera Sur	Mexico	Campeche	Yes	1	GU659892
Chlosyne theona	MAL-02548	L-76904	LYPAP172-09	El Colegio de la Frontera Sur	Mexico	Campeche	Yes	1	GU659899
Chlosyne theona	MAL-02547	L-74121	LYPAP171-09	El Colegio de la Frontera Sur	Mexico	Yucatan	Yes	1	GU659898
Chlosyne theona	MAL-02546	L-73430	LYPAP170-09	El Colegio de la Frontera Sur	Mexico	Yucatan	Yes	1	GU659897
Cissia pompilia	MAL-02574	L-59386	LYPAP480-09	El Colegio de la Frontera Sur	Mexico	Quintana Roo	Yes	1	HM890804
Cissia pompilia	MAL-04261	L-77426	LYNYM697-09	El Colegio de la Frontera Sur	Mexico	Quintana Roo	Yes	1	GU658807
Cissia pompilia	MAL-02579	L-87483	LYPAP485-09	El Colegio de la Frontera Sur	Mexico	Yucatan	Yes	1	GU659739
Cissia pompilia	MAL-02578	L-26567	LYPAP484-09	El Colegio de la Frontera Sur	Mexico	Campeche	Yes	1	GU659738
Cissia pompilia	MAL-02577	L-87484	LYPAP483-09	El Colegio de la Frontera Sur	Mexico	Yucatan	Yes	1	GU659737
Cissia pseudoconfusa	MAL-02572	L-20310	LYPAP478-09	El Colegio de la Frontera Sur	Mexico	Quintana Roo	Yes	1	GU659743
Cissia pseudoconfusa	MAL-02571	L-19440	LYPAP477-09	El Colegio de la Frontera Sur	Mexico	Campeche	Yes	1	GU659742
Cissia pseudoconfusa	MAL-02570	L-21179	LYPAP476-09	El Colegio de la Frontera Sur	Mexico	Quintana Roo	Yes	1	GU659741
Cissia pseudoconfusa	MAL-02569	L-06784	LYPAP475-09	El Colegio de la Frontera Sur	Mexico	Campeche	Yes	1	GU659747
Cissia pseudoconfusa	MAL-02564	L-31014	LYPAP188-09	El Colegio de la Frontera Sur	Mexico	Campeche	Yes	1	GU659881
Cissia pseudoconfusa	MAL-02563	L-87488	LYPAP187-09	El Colegio de la Frontera Sur	Mexico	Yucatan	Yes	1	GU659880
Cissia pseudoconfusa	MAL-02562	L-87490	LYPAP186-09	El Colegio de la Frontera Sur	Mexico	Yucatan	Yes	1	GU659887
Cissia pseudoconfusa	MAL-02561	L-21212	LYPAP185-09	El Colegio de la Frontera Sur	Mexico	Quintana Roo	Yes	1	GU659886
Cissia pseudoconfusa	MAL-02560	L-42838	LYPAP184-09	El Colegio de la Frontera Sur	Mexico	Quintana Roo	Yes	1	GU659885
Cissia pseudoconfusa	MAL-02559	L-69900	LYPAP183-09	El Colegio de la Frontera Sur	Mexico	Quintana Roo	Yes	1	HQ990161
Cissia pseudoconfusa	MAL-02558	L-43578	LYPAP182-09	El Colegio de la Frontera Sur	Mexico	Quintana Roo	Yes	1	GU659884
Cissia pseudoconfusa	MAL-02557	L-80036	LYPAP181-09	El Colegio de la Frontera Sur	Mexico	Yucatan	Yes	1	GU659891
Cissia pseudoconfusa	MAL-02556	L-80030	LYPAP180-09	El Colegio de la Frontera Sur	Mexico	Yucatan	Yes	1	HQ990160
Cissia similis	MAL-02587	L-22547	LYPAP493-09	El Colegio de la Frontera Sur	Mexico	Campeche	Yes	1	GU659736
Cissia similis	MAL-02586	L-39534	LYPAP492-09	El Colegio de la Frontera Sur	Mexico	Quintana Roo	Yes	1	GU659735
Cissia similis	MAL-02585	L-49835	LYPAP491-09	El Colegio de la Frontera Sur	Mexico	Campeche	Yes	1	GU659734
Cissia similis	MAL-02582	L-22521	LYPAP488-09	El Colegio de la Frontera Sur	Mexico	Campeche	Yes	1	GU659733
Cissia similis	MAL-02581	L-72741	LYPAP487-09	El Colegio de la Frontera Sur	Mexico	Yucatan	Yes	1	GU659740
Cissia terrestris	MAL-02844	L-40757	LYPAP844-09	El Colegio de la Frontera Sur	Mexico	Campeche	Yes	1	GU659461
Cissia terrestris	MAL-02842	L-53143	LYPAP842-09	El Colegio de la Frontera Sur	Mexico	Campeche	Yes	1	GU659466
Cissia terrestris	MAL-02590	L-41081	LYPAP496-09	El Colegio de la Frontera Sur	Mexico	Campeche	Yes	1	JN201274
Cissia terrestris	MAL-02589	L-41080	LYPAP495-09	El Colegio de la Frontera Sur	Mexico	Campeche	Yes	1	GU659731
Cissia terrestris	MAL-02588	L-41079	LYPAP494-09	El Colegio de la Frontera Sur	Mexico	Campeche	Yes	1	GU659730
Colobura dirce	MAL-02598	L-17545	LYPAP504-09	El Colegio de la Frontera Sur	Mexico	Campeche	Yes	1	GU659723
Colobura dirce	MAL-02597	L-26770	LYPAP503-09	El Colegio de la Frontera Sur	Mexico	Campeche	Yes	1	GU659722
Colobura dirce	MAL-02596	L-28383	LYPAP502-09	El Colegio de la Frontera Sur	Mexico	Campeche	Yes	1	GU659729
Colobura dirce	MAL-02595	L-28393	LYPAP501-09	El Colegio de la Frontera Sur	Mexico	Campeche	Yes	1	GU659728
Colobura dirce	MAL-02594	L-40354	LYPAP500-09	El Colegio de la Frontera Sur	Mexico	Campeche	Yes	1	GU659727
Colobura dirce	MAL-02593	L-77003	LYPAP499-09	El Colegio de la Frontera Sur	Mexico	Campeche	Yes	1	GU659726
Colobura dirce	MAL-02592	L-77130	LYPAP498-09	El Colegio de la Frontera Sur	Mexico	Quintana Roo	Yes	1	GU659732
Consul electra	MAL-02604	L-52842	LYPAP510-09	El Colegio de la Frontera Sur	Mexico	Campeche	Yes	1	GU659719
Consul electra	MAL-02603	L-30455	LYPAP509-09	El Colegio de la Frontera Sur	Mexico	Campeche	Yes	1	GU659718
Consul electra	MLL-00942	DNA-00906	LPYPA600-08	El Colegio de la Frontera Sur	Mexico	Campeche	Yes	1	JN201275
Consul electra	MAL-02602	L-42158	LYPAP508-09	El Colegio de la Frontera Sur	Mexico	Quintana Roo	Yes	1	GU659725
Consul electra	MAL-02601	L-25394	LYPAP507-09	El Colegio de la Frontera Sur	Mexico	Campeche	Yes	1	GU659724
Danaus eresimus	MAL-02615	L-86903	LYPAP521-09	El Colegio de la Frontera Sur	Mexico	Yucatan	Yes	1	JN201276
Danaus eresimus	MAL-02611	L-31973	LYPAP517-09	El Colegio de la Frontera Sur	Mexico	Campeche	Yes	1	GU659715
Danaus eresimus	MAL-02610	L-69350	LYPAP516-09	El Colegio de la Frontera Sur	Mexico	Quintana Roo	Yes	1	GU659721
Danaus eresimus	MAL-02609	L-75373	LYPAP515-09	El Colegio de la Frontera Sur	Mexico	Campeche	Yes	1	GU659720
Danaus gilippus	MAL-02625	L-87333	LYPAP531-09	El Colegio de la Frontera Sur	Mexico	Yucatan	Yes	1	GU659714
Danaus gilippus	MAL-02623	L-05032	LYPAP529-09	El Colegio de la Frontera Sur	Mexico	Quintana Roo	Yes	1	JN201277
Danaus gilippus	MAL-02620	L-40659	LYPAP526-09	El Colegio de la Frontera Sur	Mexico	Campeche	Yes	1	GU659713
Danaus gilippus	MAL-02618	L-75961	LYPAP524-09	El Colegio de la Frontera Sur	Mexico	Quintana Roo	Yes	1	GU659712
Danaus gilippus	MAL-02617	L-74267	LYPAP523-09	El Colegio de la Frontera Sur	Mexico	Yucatan	Yes	1	GU659717
Danaus gilippus	MAL-02612	L-40220	LYPAP518-09	El Colegio de la Frontera Sur	Mexico	Campeche	Yes	1	GU659716
Danaus plexippus	MAL-02633	L-25718	LYPAP539-09	El Colegio de la Frontera Sur	Mexico	Campeche	Yes	1	GU659707
Danaus plexippus	MAL-02631	L-40175	LYPAP537-09	El Colegio de la Frontera Sur	Mexico	Campeche	Yes	1	GU659706
Danaus plexippus	MAL-02630	L-31977	LYPAP536-09	El Colegio de la Frontera Sur	Mexico	Campeche	Yes	1	GU659705
Danaus plexippus	MAL-02629	L-77226	LYPAP535-09	El Colegio de la Frontera Sur	Mexico	Quintana Roo	Yes	1	HM890805
Danaus plexippus	MAL-02628	L-43799	LYPAP534-09	El Colegio de la Frontera Sur	Mexico	Quintana Roo	Yes	1	GU659711
Danaus plexippus	MAL-02627	L-59793	LYPAP533-09	El Colegio de la Frontera Sur	Mexico	Quintana Roo	Yes	1	GU659710
Danaus plexippus	MAL-02626	L-86373	LYPAP532-09	El Colegio de la Frontera Sur	Mexico	Yucatan	Yes	1	GU659709
Dione juno	MAL-02638	L-16973	LYPAP544-09	El Colegio de la Frontera Sur	Mexico	Campeche	Yes	1	GU659702
Dione juno	MAL-02636	L-17476	LYPAP542-09	El Colegio de la Frontera Sur	Mexico	Campeche	Yes	1	GU659701
Dione juno	MAL-02635	L-17848	LYPAP541-09	El Colegio de la Frontera Sur	Mexico	Campeche	Yes	1	GU659708
Doxocopa laure	MAL-02644	L-67134	LYPAP550-09	El Colegio de la Frontera Sur	Mexico	Quintana Roo	Yes	1	GU659698
Doxocopa laure	MAL-02643	L-32207	LYPAP549-09	El Colegio de la Frontera Sur	Mexico	Campeche	Yes	1	GU659697
Doxocopa laure	MAL-02641	L-13316	LYPAP547-09	El Colegio de la Frontera Sur	Mexico	Campeche	Yes	1	GU659704
Doxocopa laure	MAL-02640	L-70140	LYPAP546-09	El Colegio de la Frontera Sur	Mexico	Yucatan	Yes	1	GU659703
Doxocopa pavon	MAL-02650	L-40448	LYPAP556-09	El Colegio de la Frontera Sur	Mexico	Campeche	Yes	1	GU659696
Doxocopa pavon	MAL-02649	L-29446	LYPAP555-09	El Colegio de la Frontera Sur	Mexico	Campeche	Yes	1	GU659695
Doxocopa pavon	MAL-02648	L-22256	LYPAP554-09	El Colegio de la Frontera Sur	Mexico	Campeche	Yes	1	GU659694
Doxocopa pavon	MAL-02647	L-32814	LYPAP553-09	El Colegio de la Frontera Sur	Mexico	Campeche	Yes	1	GU659693
Doxocopa pavon	MAL-02646	L-55664	LYPAP552-09	El Colegio de la Frontera Sur	Mexico	Campeche	Yes	1	GU659700
Doxocopa pavon	MAL-02645	L-08076	LYPAP551-09	El Colegio de la Frontera Sur	Mexico	Campeche	Yes	1	GU659699
Dryadula phaetusa	MAL-02651	L-13514	LYPAP557-09	El Colegio de la Frontera Sur	Mexico	Campeche	Yes	1	HQ990183
Dryadula phaetusa	MAL-02652	L-00135	LYPAP558-09	El Colegio de la Frontera Sur	Mexico	Quintana Roo	Yes	1	HQ990184
Dryadula phaetusa	MAL-02653	L-12734	LYPAP559-09	El Colegio de la Frontera Sur	Mexico	Campeche	Yes	1	HQ990185
Dryadula phaetusa	MAL-02654	L-86982	LYPAP560-09	El Colegio de la Frontera Sur	Mexico	Yucatan	Yes	1	HQ990186
Dryadula phaetusa	MAL-02655	L-69692	LYPAP561-09	El Colegio de la Frontera Sur	Mexico	Quintana Roo	Yes	1	HQ990187
Dryas iulia	MAL-02698	L-43783	LYPAP698-09	El Colegio de la Frontera Sur	Mexico	Quintana Roo	Yes	1	GU659588
Dryas iulia	MAL-02696	L-33014	LYPAP696-09	El Colegio de la Frontera Sur	Mexico	Campeche	Yes	1	GU659594
Dryas iulia	MAL-02666	L-87407	LYPAP666-09	El Colegio de la Frontera Sur	Mexico	Yucatan	Yes	1	GU659622
Dryas iulia	MAL-02665	L-87406	LYPAP665-09	El Colegio de la Frontera Sur	Mexico	Yucatan	Yes	1	GU659621
Dryas iulia	MAL-02664	L-23237	LYPAP664-09	El Colegio de la Frontera Sur	Mexico	Campeche	Yes	1	GU659620
Dryas iulia	MAL-02663	L-03351	LYPAP663-09	El Colegio de la Frontera Sur	Mexico	Quintana Roo	Yes	1	GU659619
Dryas iulia	MAL-02662	L-05021	LYPAP662-09	El Colegio de la Frontera Sur	Mexico	Quintana Roo	Yes	1	GU659626
Dryas iulia	MAL-02661	L-28220	LYPAP661-09	El Colegio de la Frontera Sur	Mexico	Campeche	Yes	1	GU659625
Dryas iulia	MAL-02660	L-40348	LYPAP660-09	El Colegio de la Frontera Sur	Mexico	Campeche	Yes	1	GU659624
Dryas iulia	MAL-02659	L-69372	LYPAP659-09	El Colegio de la Frontera Sur	Mexico	Quintana Roo	Yes	1	GU659623
Dryas iulia	MAL-02658	L-44850	LYPAP564-09	El Colegio de la Frontera Sur	Mexico	Campeche	Yes	1	GU659691
Dryas iulia	MAL-02657	L-74105	LYPAP563-09	El Colegio de la Frontera Sur	Mexico	Yucatan	Yes	1	GU659690
Dryas iulia	MAL-02656	L-73721	LYPAP562-09	El Colegio de la Frontera Sur	Mexico	Yucatan	Yes	1	JN201278
Dryas iulia	MLL-00747	DNA-00780	LPYPC262-08	El Colegio de la Frontera Sur	Mexico	Campeche	Yes	1	JN201279
Dryas iulia	MLL-01591	DNA-01640	LPMX933-08	El Colegio de la Frontera Sur	Mexico	Campeche	Yes	1	JN201280
Dynamine dyonis	MAL-02675	L-87482	LYPAP675-09	El Colegio de la Frontera Sur	Mexico	Yucatan	Yes	1	GU659614
Dynamine dyonis	MAL-02674	L-76471	LYPAP674-09	El Colegio de la Frontera Sur	Mexico	Campeche	Yes	1	GU659613
Dynamine dyonis	MAL-02673	L-29058	LYPAP673-09	El Colegio de la Frontera Sur	Mexico	Campeche	Yes	1	GU659612
Dynamine dyonis	MAL-02672	L-72228	LYPAP672-09	El Colegio de la Frontera Sur	Mexico	Yucatan	Yes	1	GU659611
Dynamine dyonis	MAL-02671	L-87475	LYPAP671-09	El Colegio de la Frontera Sur	Mexico	Yucatan	Yes	1	GU659618
Dynamine dyonis	MAL-02670	L-32898	LYPAP670-09	El Colegio de la Frontera Sur	Mexico	Campeche	Yes	1	GU659617
Dynamine dyonis	MAL-02669	L-01639	LYPAP669-09	El Colegio de la Frontera Sur	Mexico	Quintana Roo	Yes	1	GU659616
Dynamine dyonis	MAL-02668	L-00826	LYPAP668-09	El Colegio de la Frontera Sur	Mexico	Quintana Roo	Yes	1	GU659615
Dynamine dyonis	MAL-02667	L-01529	LYPAP667-09	El Colegio de la Frontera Sur	Mexico	Quintana Roo	Yes	1	HM388548
Dynamine postverta	MAL-02683	L-87012	LYPAP683-09	El Colegio de la Frontera Sur	Mexico	Yucatan	Yes	1	GU659606
Dynamine postverta	MAL-02682	L-69721	LYPAP682-09	El Colegio de la Frontera Sur	Mexico	Quintana Roo	Yes	1	GU659605
Dynamine postverta	MAL-02681	L-85055	LYPAP681-09	El Colegio de la Frontera Sur	Mexico	Quintana Roo	Yes	1	GU659604
Dynamine postverta	MAL-02680	L-42848	LYPAP680-09	El Colegio de la Frontera Sur	Mexico	Campeche	Yes	1	GU659603
Dynamine postverta	MAL-02679	L-28949	LYPAP679-09	El Colegio de la Frontera Sur	Mexico	Campeche	Yes	1	GU659610
Dynamine postverta	MAL-02678	L-28950	LYPAP678-09	El Colegio de la Frontera Sur	Mexico	Campeche	Yes	1	GU659609
Dynamine postverta	MAL-02677	L-73439	LYPAP677-09	El Colegio de la Frontera Sur	Mexico	Yucatan	Yes	1	GU659608
Dynamine postverta	MAL-02676	L-72864	LYPAP676-09	El Colegio de la Frontera Sur	Mexico	Yucatan	Yes	1	GU659607
Dynamine theseus	MAL-02688	L-76474	LYPAP688-09	El Colegio de la Frontera Sur	Mexico	Campeche	Yes	1	GU659602
Dynamine theseus	MAL-02687	L-86685	LYPAP687-09	El Colegio de la Frontera Sur	Mexico	Yucatan	Yes	1	GU659601
Dynamine theseus	MAL-02686	L-04166	LYPAP686-09	El Colegio de la Frontera Sur	Mexico	Quintana Roo	Yes	1	GU659600
Dynamine theseus	MAL-02685	L-03748	LYPAP685-09	El Colegio de la Frontera Sur	Mexico	Quintana Roo	Yes	1	GU659599
Dynamine theseus	MAL-02684	L-02715	LYPAP684-09	El Colegio de la Frontera Sur	Mexico	Quintana Roo	Yes	1	HM388549
Dynamine theseus	MAL-04999	L-86122	LYHES871-09	El Colegio de la Frontera Sur	Mexico	Yucatan	Yes	1	GU657911
Eryphanis aesacus	MAL-02692	L-00898	LYPAP692-09	El Colegio de la Frontera Sur	Mexico	Quintana Roo	Yes	1	GU659598
Eryphanis aesacus	MAL-02691	L-08726	LYPAP691-09	El Colegio de la Frontera Sur	Mexico	Campeche	Yes	1	GU659597
Eryphanis aesacus	MAL-02690	L-02434	LYPAP690-09	El Colegio de la Frontera Sur	Mexico	Quintana Roo	Yes	1	GU659596
Eryphanis aesacus	MAL-02689	L-09495	LYPAP689-09	El Colegio de la Frontera Sur	Mexico	Campeche	Yes	1	GU659595
Eueides aliphera	MAL-02697	L-40608	LYPAP697-09	El Colegio de la Frontera Sur	Mexico	Campeche	Yes	1	GU659587
Eueides aliphera	MAL-02695	L-03494	LYPAP695-09	El Colegio de la Frontera Sur	Mexico	Quintana Roo	Yes	1	GU659593
Eueides aliphera	MAL-02694	L-22101	LYPAP694-09	El Colegio de la Frontera Sur	Mexico	Campeche	Yes	1	GU659592
Eueides aliphera	MAL-02693	L-22057	LYPAP693-09	El Colegio de la Frontera Sur	Mexico	Campeche	Yes	1	GU659591
Eueides isabella	MAL-02704	L-67151	LYPAP704-09	El Colegio de la Frontera Sur	Mexico	Quintana Roo	Yes	1	GU659586
Eueides isabella	MAL-02703	L-31846	LYPAP703-09	El Colegio de la Frontera Sur	Mexico	Campeche	Yes	1	GU659585
Eueides isabella	MAL-02702	L-02679	LYPAP702-09	El Colegio de la Frontera Sur	Mexico	Quintana Roo	Yes	1	GU659584
Eueides isabella	MAL-02701	L-22878	LYPAP701-09	El Colegio de la Frontera Sur	Mexico	Campeche	Yes	1	GU659583
Eueides isabella	MAL-02700	L-40330	LYPAP700-09	El Colegio de la Frontera Sur	Mexico	Campeche	Yes	1	GU659590
Eueides isabella	MAL-02699	L-36484	LYPAP699-09	El Colegio de la Frontera Sur	Mexico	Campeche	Yes	1	GU659589
Eunica alcmena	MAL-02709	L-20199	LYPAP709-09	El Colegio de la Frontera Sur	Mexico	Quintana Roo	Yes	1	GU659575
Eunica alcmena	MAL-02708	L-19277	LYPAP708-09	El Colegio de la Frontera Sur	Mexico	Campeche	Yes	1	GU659582
Eunica alcmena	MAL-02707	L-20729	LYPAP707-09	El Colegio de la Frontera Sur	Mexico	Campeche	Yes	1	GU659581
Eunica alcmena	MAL-02706	L-08840	LYPAP706-09	El Colegio de la Frontera Sur	Mexico	Campeche	Yes	1	GU659580
Eunica alcmena	MAL-02705	L-20235	LYPAP705-09	El Colegio de la Frontera Sur	Mexico	Quintana Roo	Yes	1	GU659579
Eunica monima	MAL-02717	L-43400	LYPAP717-09	El Colegio de la Frontera Sur	Mexico	Quintana Roo	Yes	1	GU659567
Eunica monima	MAL-02716	L-56455	LYPAP716-09	El Colegio de la Frontera Sur	Mexico	Campeche	Yes	1	GU659574
Eunica monima	MAL-02715	L-56968	LYPAP715-09	El Colegio de la Frontera Sur	Mexico	Campeche	Yes	1	GU659573
Eunica monima	MAL-02714	L-28716	LYPAP714-09	El Colegio de la Frontera Sur	Mexico	Campeche	Yes	1	GU659572
Eunica monima	MAL-02713	L-20020	LYPAP713-09	El Colegio de la Frontera Sur	Mexico	Campeche	Yes	1	GU659571
Eunica monima	MAL-02711	L-40363	LYPAP711-09	El Colegio de la Frontera Sur	Mexico	Campeche	Yes	1	GU659577
Eunica monima	MAL-02710	L-70146	LYPAP710-09	El Colegio de la Frontera Sur	Mexico	Yucatan	Yes	1	GU659576
Eunica tatila	MAL-02725	L-30603	LYPAP725-09	El Colegio de la Frontera Sur	Mexico	Campeche	Yes	1	GU659559
Eunica tatila	MAL-02724	L-68471	LYPAP724-09	El Colegio de la Frontera Sur	Mexico	Quintana Roo	Yes	1	GU659566
Eunica tatila	MAL-02723	L-32587	LYPAP723-09	El Colegio de la Frontera Sur	Mexico	Campeche	Yes	1	GU659565
Eunica tatila	MAL-02722	L-87193	LYPAP722-09	El Colegio de la Frontera Sur	Mexico	Yucatan	Yes	1	GU659564
Eunica tatila	MAL-02721	L-87190	LYPAP721-09	El Colegio de la Frontera Sur	Mexico	Yucatan	Yes	1	GU659563
Eunica tatila	MAL-02720	L-44294	LYPAP720-09	El Colegio de la Frontera Sur	Mexico	Quintana Roo	Yes	1	GU659570
Eunica tatila	MAL-02719	L-76554	LYPAP719-09	El Colegio de la Frontera Sur	Mexico	Campeche	Yes	1	GU659569
Eunica tatila	MAL-02718	L-44020	LYPAP718-09	El Colegio de la Frontera Sur	Mexico	Quintana Roo	Yes	1	GU659568
Eunica tatila	MAL-02712	L-87212	LYPAP712-09	El Colegio de la Frontera Sur	Mexico	Yucatan	Yes	1	GU659578
Euptoieta claudia	MAL-02732	L-87452	LYPAP732-09	El Colegio de la Frontera Sur	Mexico	Yucatan	Yes	1	GU659562
Euptoieta claudia	MAL-02729	L-65763	LYPAP729-09	El Colegio de la Frontera Sur	Mexico	Campeche	Yes	1	GU659561
Euptoieta claudia	MAL-02728	L-32810	LYPAP728-09	El Colegio de la Frontera Sur	Mexico	Campeche	Yes	1	GU659560
Euptoieta claudia	MAL-02726	L-70650	LYPAP726-09	El Colegio de la Frontera Sur	Mexico	Yucatan	Yes	1	JN201281
Euptoieta hegesia	MAL-02737	L-75681	LYPAP737-09	El Colegio de la Frontera Sur	Mexico	Quintana Roo	Yes	1	JN201282
Euptoieta hegesia	MAL-02735	L-05038	LYPAP735-09	El Colegio de la Frontera Sur	Mexico	Quintana Roo	Yes	1	JN201283
Euptoieta hegesia	MAL-02734	L-40677	LYPAP734-09	El Colegio de la Frontera Sur	Mexico	Campeche	Yes	1	JN201284
Euptoieta hegesia	MAL-02733	L-73367	LYPAP733-09	El Colegio de la Frontera Sur	Mexico	Yucatan	Yes	1	JN201285
Fountainea eurypyle	MAL-02742	L-29745	LYPAP742-09	El Colegio de la Frontera Sur	Mexico	Campeche	Yes	1	GU659556
Fountainea eurypyle	MAL-02741	L-29757	LYPAP741-09	El Colegio de la Frontera Sur	Mexico	Campeche	Yes	1	JN201286
Fountainea eurypyle	MAL-02739	L-61711	LYPAP739-09	El Colegio de la Frontera Sur	Mexico	Campeche	Yes	1	HM388550
Fountainea eurypyle	MAL-02748	L-29759	LYPAP748-09	El Colegio de la Frontera Sur	Mexico	Campeche	Yes	1	GU659554
Fountainea eurypyle	MAL-02747	L-24972	LYPAP747-09	El Colegio de la Frontera Sur	Mexico	Campeche	Yes	1	GU659553
Fountainea eurypyle	MAL-02746	L-30743	LYPAP746-09	El Colegio de la Frontera Sur	Mexico	Campeche	Yes	1	GU659552
Fountainea eurypyle	MAL-02745	L-76628	LYPAP745-09	El Colegio de la Frontera Sur	Mexico	Campeche	Yes	1	GU659551
Fountainea eurypyle	MAL-02744	L-29741	LYPAP744-09	El Colegio de la Frontera Sur	Mexico	Campeche	Yes	1	GU659558
Fountainea eurypyle	MAL-02743	L-29742	LYPAP743-09	El Colegio de la Frontera Sur	Mexico	Campeche	Yes	1	GU659557
Fountainea eurypyle	MLL-00706	DNA-00739	LPYPC221-08	El Colegio de la Frontera Sur	Mexico	Campeche	Yes	1	JN201287
Fountainea glycerium	MAL-02753	L-85646	LYPAP753-09	El Colegio de la Frontera Sur	Mexico	Yucatan	Yes	1	GU659543
Fountainea glycerium	MAL-02752	L-85638	LYPAP752-09	El Colegio de la Frontera Sur	Mexico	Yucatan	Yes	1	GU659550
Fountainea glycerium	MAL-02751	L-85636	LYPAP751-09	El Colegio de la Frontera Sur	Mexico	Yucatan	Yes	1	GU659549
Fountainea glycerium	MAL-02750	L-85635	LYPAP750-09	El Colegio de la Frontera Sur	Mexico	Yucatan	Yes	1	GU659548
Fountainea glycerium	MAL-02749	L-85569	LYPAP749-09	El Colegio de la Frontera Sur	Mexico	Yucatan	Yes	1	GU659547
Fountainea glycerium	MAL-02740	L-71407	LYPAP740-09	El Colegio de la Frontera Sur	Mexico	Yucatan	Yes	1	GU659555
Fountainea halice	MAL-02758	L-88617	LYPAP758-09	El Colegio de la Frontera Sur	Mexico	Yucatan	Yes	1	GU659540
Fountainea halice	MAL-02757	L-88646	LYPAP757-09	El Colegio de la Frontera Sur	Mexico	Yucatan	Yes	1	GU659539
Fountainea halice	MAL-02756	L-88655	LYPAP756-09	El Colegio de la Frontera Sur	Mexico	Yucatan	Yes	1	GU659546
Fountainea halice	MAL-02755	L-88656	LYPAP755-09	El Colegio de la Frontera Sur	Mexico	Yucatan	Yes	1	GU659545
Fountainea halice	MAL-02754	L-88657	LYPAP754-09	El Colegio de la Frontera Sur	Mexico	Yucatan	Yes	1	GU659544
Hamadryas amphinome	MAL-02768	L-46387	LYPAP768-09	El Colegio de la Frontera Sur	Mexico	Campeche	Yes	1	GU659536
Hamadryas amphinome	MAL-02767	L-29904	LYPAP767-09	El Colegio de la Frontera Sur	Mexico	Campeche	Yes	1	GU659535
Hamadryas amphinome	MAL-02766	L-41018	LYPAP766-09	El Colegio de la Frontera Sur	Mexico	Campeche	Yes	1	GU659542
Hamadryas amphinome	MAL-02764	L-36171	LYPAP764-09	El Colegio de la Frontera Sur	Mexico	Campeche	Yes	1	GU659541
Hamadryas februa	MAL-02779	L-01720	LYPAP779-09	El Colegio de la Frontera Sur	Mexico	Quintana Roo	Yes	1	GU659524
Hamadryas februa	MAL-02778	L-05027	LYPAP778-09	El Colegio de la Frontera Sur	Mexico	Quintana Roo	Yes	1	GU659530
Hamadryas februa	MAL-02777	L-42908	LYPAP777-09	El Colegio de la Frontera Sur	Mexico	Quintana Roo	Yes	1	GU659529
Hamadryas februa	MAL-02776	L-58828	LYPAP776-09	El Colegio de la Frontera Sur	Mexico	Quintana Roo	Yes	1	GU659528
Hamadryas februa	MAL-02775	L-87479	LYPAP775-09	El Colegio de la Frontera Sur	Mexico	Yucatan	Yes	1	GU659527
Hamadryas februa	MAL-02774	L-87505	LYPAP774-09	El Colegio de la Frontera Sur	Mexico	Yucatan	Yes	1	GU659534
Hamadryas februa	MAL-02773	L-87502	LYPAP773-09	El Colegio de la Frontera Sur	Mexico	Yucatan	Yes	1	GU659533
Hamadryas februa	MAL-02772	L-87531	LYPAP772-09	El Colegio de la Frontera Sur	Mexico	Yucatan	Yes	1	GU659532
Hamadryas februa	MAL-02771	L-70130	LYPAP771-09	El Colegio de la Frontera Sur	Mexico	Yucatan	Yes	1	GU659531
Hamadryas februa	MAL-02770	L-73329	LYPAP770-09	El Colegio de la Frontera Sur	Mexico	Yucatan	Yes	1	GU659538
Hamadryas februa	MLL-02196	DNA-02254	LPYPC072-08	El Colegio de la Frontera Sur	Mexico	Yucatan	Yes	1	JN201288
Hamadryas feroniaECO01	MAL-02781	L-00259	LYPAP781-09	El Colegio de la Frontera Sur	Mexico	Quintana Roo	Yes	1	GU659526
Hamadryas feroniaECO02	MAL-02780	L-00521	LYPAP780-09	El Colegio de la Frontera Sur	Mexico	Quintana Roo	Yes	1	GU659525
Hamadryas feroniaECO02	MAL-02786	L-46632	LYPAP786-09	El Colegio de la Frontera Sur	Mexico	Campeche	Yes	1	GU659523
Hamadryas guatemalena	MAL-02796	L-86531	LYPAP796-09	El Colegio de la Frontera Sur	Mexico	Yucatan	Yes	1	GU659509
Hamadryas guatemalena	MAL-02795	L-87084	LYPAP795-09	El Colegio de la Frontera Sur	Mexico	Yucatan	Yes	1	GU659508
Hamadryas guatemalena	MAL-02794	L-40402	LYPAP794-09	El Colegio de la Frontera Sur	Mexico	Campeche	Yes	1	GU659515
Hamadryas guatemalena	MAL-02793	L-59819	LYPAP793-09	El Colegio de la Frontera Sur	Mexico	Quintana Roo	Yes	1	GU659514
Hamadryas guatemalena	MAL-02792	L-69886	LYPAP792-09	El Colegio de la Frontera Sur	Mexico	Quintana Roo	Yes	1	GU659513
Hamadryas guatemalena	MAL-02791	L-69887	LYPAP791-09	El Colegio de la Frontera Sur	Mexico	Quintana Roo	Yes	1	GU659512
Hamadryas guatemalena	MAL-02790	L-29905	LYPAP790-09	El Colegio de la Frontera Sur	Mexico	Campeche	Yes	1	GU659519
Hamadryas guatemalena	MAL-02789	L-65689	LYPAP789-09	El Colegio de la Frontera Sur	Mexico	Campeche	Yes	1	GU659518
Hamadryas guatemalena	MAL-02788	L-70243	LYPAP788-09	El Colegio de la Frontera Sur	Mexico	Yucatan	Yes	1	GU659517
Hamadryas guatemalena	MAL-02787	L-73517	LYPAP787-09	El Colegio de la Frontera Sur	Mexico	Yucatan	Yes	1	GU659516
Hamadryas guatemalena	MAL-02785	L-44369	LYPAP785-09	El Colegio de la Frontera Sur	Mexico	Quintana Roo	Yes	1	GU659522
Hamadryas guatemalena	MAL-02784	L-43954	LYPAP784-09	El Colegio de la Frontera Sur	Mexico	Quintana Roo	Yes	1	GU659521
Hamadryas guatemalena	MAL-02783	L-38870	LYPAP783-09	El Colegio de la Frontera Sur	Mexico	Quintana Roo	Yes	1	GU659520
Hamadryas iphthime	MAL-02782	L-42132	LYPAP782-09	El Colegio de la Frontera Sur	Mexico	Quintana Roo	Yes	1	HM431617
Hamadryas julitta	MLL-00210	DNA-00202	LPMX210-07	El Colegio de la Frontera Sur	Mexico	Campeche	Yes	1	JN201289
Hamadryas julitta	MAL-02811	L-44336	LYPAP811-09	El Colegio de la Frontera Sur	Mexico	Quintana Roo	Yes	1	GU659499
Hamadryas julitta	MAL-02810	L-67003	LYPAP810-09	El Colegio de la Frontera Sur	Mexico	Quintana Roo	Yes	1	GU659498
Hamadryas julitta	MAL-02809	L-56313	LYPAP809-09	El Colegio de la Frontera Sur	Mexico	Campeche	Yes	1	GU659497
Hamadryas julitta	MAL-02808	L-70448	LYPAP808-09	El Colegio de la Frontera Sur	Mexico	Yucatan	Yes	1	GU659496
Hamadryas julitta	MAL-02807	L-70693	LYPAP807-09	El Colegio de la Frontera Sur	Mexico	Yucatan	Yes	1	GU659503
Hamadryas julitta	MAL-02805	L-87158	LYPAP805-09	El Colegio de la Frontera Sur	Mexico	Yucatan	Yes	1	GU659502
Hamadryas julitta	MAL-02804	L-87151	LYPAP804-09	El Colegio de la Frontera Sur	Mexico	Yucatan	Yes	1	GU659501
Hamadryas julitta	MAL-02803	L-68461	LYPAP803-09	El Colegio de la Frontera Sur	Mexico	Quintana Roo	Yes	1	GU659500
Hamadryas julitta	MAL-02802	L-87124	LYPAP802-09	El Colegio de la Frontera Sur	Mexico	Yucatan	Yes	1	GU659507
Hamadryas julitta	MAL-02801	L-87132	LYPAP801-09	El Colegio de la Frontera Sur	Mexico	Yucatan	Yes	1	GU659506
Hamadryas julitta	MAL-02800	L-34277	LYPAP800-09	El Colegio de la Frontera Sur	Mexico	Quintana Roo	Yes	1	GU659505
Hamadryas julitta	MAL-02799	L-65692	LYPAP799-09	El Colegio de la Frontera Sur	Mexico	Campeche	Yes	1	GU659504
Hamadryas julitta	MAL-02798	L-33907	LYPAP798-09	El Colegio de la Frontera Sur	Mexico	Quintana Roo	Yes	1	GU659511
Hamadryas julitta	MAL-02797	L-24244	LYPAP797-09	El Colegio de la Frontera Sur	Mexico	Campeche	Yes	1	GU659510
Hamadryas julitta	MAL-02769	L-42338	LYPAP769-09	El Colegio de la Frontera Sur	Mexico	Campeche	Yes	1	GU659537
Hamadryas julitta	MLL-02183	DNA-02241	LPYPC059-08	El Colegio de la Frontera Sur	Mexico	Yucatan	Yes	2	JN201290
Hamadryas julitta	MLL-02179	DNA-02237	LPYPC055-08	El Colegio de la Frontera Sur	Mexico	Yucatan	Yes	2	JN201291
Heliconius charithonia	MAL-02824	L-69412	LYPAP824-09	El Colegio de la Frontera Sur	Mexico	Quintana Roo	Yes	1	GU659480
Heliconius charithonia	MAL-02823	L-65795	LYPAP823-09	El Colegio de la Frontera Sur	Mexico	Campeche	Yes	1	GU659487
Heliconius charithonia	MAL-02822	L-03496	LYPAP822-09	El Colegio de la Frontera Sur	Mexico	Quintana Roo	Yes	1	GU659486
Heliconius charithonia	MAL-02821	L-28102	LYPAP821-09	El Colegio de la Frontera Sur	Mexico	Campeche	Yes	1	GU659485
Heliconius charithonia	MAL-02820	L-77080	LYPAP820-09	El Colegio de la Frontera Sur	Mexico	Quintana Roo	Yes	1	GU659484
Heliconius charithonia	MAL-02819	L-28109	LYPAP819-09	El Colegio de la Frontera Sur	Mexico	Campeche	Yes	1	GU659491
Heliconius charithonia	MAL-02818	L-56674	LYPAP818-09	El Colegio de la Frontera Sur	Mexico	Campeche	Yes	1	GU659490
Heliconius charithonia	MAL-02817	L-75573	LYPAP817-09	El Colegio de la Frontera Sur	Mexico	Quintana Roo	Yes	1	GU659489
Heliconius charithonia	MAL-02816	L-69779	LYPAP816-09	El Colegio de la Frontera Sur	Mexico	Quintana Roo	Yes	1	GU659488
Heliconius charithonia	MAL-02815	L-59776	LYPAP815-09	El Colegio de la Frontera Sur	Mexico	Quintana Roo	Yes	1	GU659495
Heliconius charithonia	MAL-02814	L-86607	LYPAP814-09	El Colegio de la Frontera Sur	Mexico	Yucatan	Yes	1	GU659494
Heliconius charithonia	MAL-02813	L-86568	LYPAP813-09	El Colegio de la Frontera Sur	Mexico	Yucatan	Yes	1	GU659493
Heliconius charithonia	MAL-02812	L-86569	LYPAP812-09	El Colegio de la Frontera Sur	Mexico	Yucatan	Yes	1	GU659492
Heliconius erato	MAL-02836	L-87307	LYPAP836-09	El Colegio de la Frontera Sur	Mexico	Yucatan	Yes	1	GU659468
Heliconius erato	MAL-02835	L-01278	LYPAP835-09	El Colegio de la Frontera Sur	Mexico	Quintana Roo	Yes	1	GU659475
Heliconius erato	MAL-02834	L-02807	LYPAP834-09	El Colegio de la Frontera Sur	Mexico	Quintana Roo	Yes	1	GU659474
Heliconius erato	MAL-02833	L-28302	LYPAP833-09	El Colegio de la Frontera Sur	Mexico	Campeche	Yes	1	GU659473
Heliconius erato	MAL-02832	L-28339	LYPAP832-09	El Colegio de la Frontera Sur	Mexico	Campeche	Yes	1	GU659472
Heliconius erato	MAL-02831	L-28316	LYPAP831-09	El Colegio de la Frontera Sur	Mexico	Campeche	Yes	1	GU659479
Heliconius erato	MAL-02830	L-28303	LYPAP830-09	El Colegio de la Frontera Sur	Mexico	Campeche	Yes	1	GU659478
Heliconius erato	MAL-02829	L-43171	LYPAP829-09	El Colegio de la Frontera Sur	Mexico	Campeche	Yes	1	GU659477
Heliconius erato	MAL-02828	L-56253	LYPAP828-09	El Colegio de la Frontera Sur	Mexico	Campeche	Yes	1	GU659476
Heliconius erato	MAL-02827	L-43915	LYPAP827-09	El Colegio de la Frontera Sur	Mexico	Quintana Roo	Yes	1	GU659483
Heliconius erato	MAL-02826	L-59769	LYPAP826-09	El Colegio de la Frontera Sur	Mexico	Quintana Roo	Yes	1	GU659482
Heliconius erato	MAL-02825	L-86605	LYPAP825-09	El Colegio de la Frontera Sur	Mexico	Yucatan	Yes	1	GU659481
Heliconius erato	MLL-01724	DNA-01779	LPYPA066-08	El Colegio de la Frontera Sur	Mexico	Campeche	Yes	1	JN201292
Heliconius ismenius	MAL-02937	L-43153	LYPAP937-09	El Colegio de la Frontera Sur	Mexico	Campeche	Yes	1	GU659374
Heliconius ismenius	MAL-02838	L-40321	LYPAP838-09	El Colegio de la Frontera Sur	Mexico	Campeche	Yes	1	GU659470
Heliconius ismenius	MAL-02837	L-40320	LYPAP837-09	El Colegio de la Frontera Sur	Mexico	Campeche	Yes	1	GU659469
Hermeuptychia hermesECO01	MAL-02845	L-24994	LYPAP845-09	El Colegio de la Frontera Sur	Mexico	Campeche	Yes	1	HM431618
Hermeuptychia hermesECO02	MAL-02846	L-87416	LYPAP846-09	El Colegio de la Frontera Sur	Mexico	Yucatan	Yes	1	GU659462
Hermeuptychia hermesECO02	MAL-02840	L-77415	LYPAP840-09	El Colegio de la Frontera Sur	Mexico	Quintana Roo	Yes	1	GU659464
Hermeuptychia hermesECO03	MAL-02848	L-80008	LYPAP848-09	El Colegio de la Frontera Sur	Mexico	Yucatan	Yes	1	GU659457
Hermeuptychia hermesECO03	MAL-02847	L-72727	LYPAP847-09	El Colegio de la Frontera Sur	Mexico	Yucatan	Yes	1	GU659463
Hermeuptychia hermesECO03	MAL-02843	L-59134	LYPAP843-09	El Colegio de la Frontera Sur	Mexico	Quintana Roo	Yes	1	GU659467
Hermeuptychia hermesECO03	MAL-02841	L-77416	LYPAP841-09	El Colegio de la Frontera Sur	Mexico	Quintana Roo	Yes	1	GU659465
Hermeuptychia hermesECO03	MAL-02839	L-87423	LYPAP839-09	El Colegio de la Frontera Sur	Mexico	Yucatan	Yes	1	GU659471
Historis acheronta	MAL-02860	L-20327	LYPAP860-09	El Colegio de la Frontera Sur	Mexico	Quintana Roo	Yes	1	GU659445
Historis acheronta	MAL-02859	L-25005	LYPAP859-09	El Colegio de la Frontera Sur	Mexico	Campeche	Yes	1	GU659452
Historis acheronta	MAL-02858	L-26684	LYPAP858-09	El Colegio de la Frontera Sur	Mexico	Campeche	Yes	1	GU659451
Historis acheronta	MAL-02857	L-28030	LYPAP857-09	El Colegio de la Frontera Sur	Mexico	Campeche	Yes	1	GU659450
Historis acheronta	MAL-02856	L-28031	LYPAP856-09	El Colegio de la Frontera Sur	Mexico	Campeche	Yes	1	GU659449
Historis acheronta	MAL-02855	L-40249	LYPAP855-09	El Colegio de la Frontera Sur	Mexico	Campeche	Yes	1	GU659456
Historis acheronta	MAL-02854	L-59023	LYPAP854-09	El Colegio de la Frontera Sur	Mexico	Quintana Roo	Yes	1	GU659455
Historis acheronta	MAL-02853	L-65681	LYPAP853-09	El Colegio de la Frontera Sur	Mexico	Campeche	Yes	1	GU659454
Historis acheronta	MAL-02852	L-75843	LYPAP852-09	El Colegio de la Frontera Sur	Mexico	Quintana Roo	Yes	1	GU659453
Historis acheronta	MAL-02851	L-86235	LYPAP851-09	El Colegio de la Frontera Sur	Mexico	Yucatan	Yes	1	GU659460
Historis acheronta	MAL-02850	L-86239	LYPAP850-09	El Colegio de la Frontera Sur	Mexico	Yucatan	Yes	1	GU659459
Historis acheronta	MAL-02849	L-30789	LYPAP849-09	El Colegio de la Frontera Sur	Mexico	Campeche	Yes	1	GU659458
Historis odius	MAL-02873	L-69052	LYPAP873-09	El Colegio de la Frontera Sur	Mexico	Quintana Roo	Yes	1	GU659434
Historis odius	MAL-02872	L-35946	LYPAP872-09	El Colegio de la Frontera Sur	Mexico	Quintana Roo	Yes	1	GU659433
Historis odius	MAL-02871	L-57737	LYPAP871-09	El Colegio de la Frontera Sur	Mexico	Quintana Roo	Yes	1	GU659440
Historis odius	MAL-02870	L-86556	LYPAP870-09	El Colegio de la Frontera Sur	Mexico	Yucatan	Yes	1	GU659439
Historis odius	MAL-02869	L-86554	LYPAP869-09	El Colegio de la Frontera Sur	Mexico	Yucatan	Yes	1	GU659438
Historis odius	MAL-02868	L-86555	LYPAP868-09	El Colegio de la Frontera Sur	Mexico	Yucatan	Yes	1	GU659437
Historis odius	MAL-02867	L-31891	LYPAP867-09	El Colegio de la Frontera Sur	Mexico	Campeche	Yes	1	GU659444
Historis odius	MAL-02866	L-20031	LYPAP866-09	El Colegio de la Frontera Sur	Mexico	Campeche	Yes	1	GU659443
Historis odius	MAL-02865	L-26774	LYPAP865-09	El Colegio de la Frontera Sur	Mexico	Campeche	Yes	1	GU659442
Historis odius	MAL-02864	L-28028	LYPAP864-09	El Colegio de la Frontera Sur	Mexico	Campeche	Yes	1	GU659441
Historis odius	MAL-02863	L-42142	LYPAP863-09	El Colegio de la Frontera Sur	Mexico	Quintana Roo	Yes	1	GU659448
Historis odius	MAL-02862	L-68971	LYPAP862-09	El Colegio de la Frontera Sur	Mexico	Quintana Roo	Yes	1	GU659447
Historis odius	MAL-02861	L-36566	LYPAP861-09	El Colegio de la Frontera Sur	Mexico	Campeche	Yes	1	GU659446
Junonia evarete	MAL-02877	L-02666	LYPAP877-09	El Colegio de la Frontera Sur	Mexico	Quintana Roo	Yes	1	JN201293
Junonia evarete	MAL-02884	L-62124	LYPAP884-09	El Colegio de la Frontera Sur	Mexico	Campeche	Yes	1	GU659427
Junonia evarete	MAL-02883	L-43827	LYPAP883-09	El Colegio de la Frontera Sur	Mexico	Quintana Roo	Yes	1	GU659426
Junonia evarete	MAL-02882	L-69403	LYPAP882-09	El Colegio de la Frontera Sur	Mexico	Quintana Roo	Yes	1	GU659425
Junonia evarete	MAL-02881	L-76995	LYPAP881-09	El Colegio de la Frontera Sur	Mexico	Campeche	Yes	1	GU659432
Junonia evarete	MAL-02880	L-87405	LYPAP880-09	El Colegio de la Frontera Sur	Mexico	Yucatan	Yes	1	GU659431
Junonia evarete	MAL-02879	L-87399	LYPAP879-09	El Colegio de la Frontera Sur	Mexico	Yucatan	Yes	1	GU659430
Junonia evarete	MAL-02878	L-73800	LYPAP878-09	El Colegio de la Frontera Sur	Mexico	Yucatan	Yes	1	GU659429
Junonia evarete	MAL-02876	L-30076	LYPAP876-09	El Colegio de la Frontera Sur	Mexico	Campeche	Yes	1	GU659436
Junonia evarete	MAL-02875	L-00962	LYPAP875-09	El Colegio de la Frontera Sur	Mexico	Quintana Roo	Yes	1	GU659435
Junonia evarete	MAL-02874	L-00055	LYPAP874-09	El Colegio de la Frontera Sur	Mexico	Quintana Roo	Yes	1	HQ990188
Libytheana carinenta	MAL-02895	L-76963	LYPAP895-09	El Colegio de la Frontera Sur	Mexico	Campeche	Yes	1	GU659414
Libytheana carinenta	MAL-02894	L-03607	LYPAP894-09	El Colegio de la Frontera Sur	Mexico	Quintana Roo	Yes	1	GU659413
Libytheana carinenta	MAL-02893	L-76964	LYPAP893-09	El Colegio de la Frontera Sur	Mexico	Campeche	Yes	1	GU659420
Libytheana carinenta	MAL-02892	L-75371	LYPAP892-09	El Colegio de la Frontera Sur	Mexico	Campeche	Yes	1	GU659419
Libytheana carinenta	MAL-02891	L-04995	LYPAP891-09	El Colegio de la Frontera Sur	Mexico	Quintana Roo	Yes	1	GU659418
Libytheana carinenta	MAL-02890	L-05844	LYPAP890-09	El Colegio de la Frontera Sur	Mexico	Quintana Roo	Yes	1	GU659417
Libytheana carinenta	MAL-02889	L-05845	LYPAP889-09	El Colegio de la Frontera Sur	Mexico	Quintana Roo	Yes	1	GU659424
Libytheana carinenta	MAL-02888	L-24421	LYPAP888-09	El Colegio de la Frontera Sur	Mexico	Campeche	Yes	1	GU659423
Libytheana carinenta	MAL-02887	L-24903	LYPAP887-09	El Colegio de la Frontera Sur	Mexico	Campeche	Yes	1	GU659422
Libytheana carinenta	MAL-02886	L-40364	LYPAP886-09	El Colegio de la Frontera Sur	Mexico	Campeche	Yes	1	GU659421
Libytheana carinenta	MAL-02885	L-65824	LYPAP885-09	El Colegio de la Frontera Sur	Mexico	Campeche	Yes	1	GU659428
Lycorea halia	MAL-02900	L-43156	LYPAP900-09	El Colegio de la Frontera Sur	Mexico	Campeche	Yes	1	GU659411
Lycorea halia	MAL-02899	L-43155	LYPAP899-09	El Colegio de la Frontera Sur	Mexico	Campeche	Yes	1	GU659410
Lycorea halia	MAL-02898	L-43154	LYPAP898-09	El Colegio de la Frontera Sur	Mexico	Campeche	Yes	1	GU659409
Lycorea halia	MAL-02897	L-40609	LYPAP897-09	El Colegio de la Frontera Sur	Mexico	Campeche	Yes	1	GU659416
Lycorea halia	MAL-02896	L-12064	LYPAP896-09	El Colegio de la Frontera Sur	Mexico	Campeche	Yes	1	GU659415
Magneuptychia libyeECO01	MAL-02906	L-08621	LYPAP906-09	El Colegio de la Frontera Sur	Mexico	Campeche	Yes	1	GU659401
Magneuptychia libyeECO01	MAL-02905	L-87987	LYPAP905-09	El Colegio de la Frontera Sur	Mexico	Yucatan	Yes	1	GU659408
Magneuptychia libyeECO01	MAL-02904	L-25702	LYPAP904-09	El Colegio de la Frontera Sur	Mexico	Campeche	Yes	1	GU659407
Magneuptychia libyeECO01	MAL-02903	L-09480	LYPAP903-09	El Colegio de la Frontera Sur	Mexico	Campeche	Yes	1	GU659406
Magneuptychia libyeECO02	MAL-02901	L-42826	LYPAP901-09	El Colegio de la Frontera Sur	Mexico	Campeche	Yes	1	GU659412
Manataria maculata	MAL-02909	L-21488	LYPAP909-09	El Colegio de la Frontera Sur	Mexico	Campeche	Yes	1	GU659404
Manataria maculata	MAL-02908	L-21478	LYPAP908-09	El Colegio de la Frontera Sur	Mexico	Campeche	Yes	1	GU659403
Manataria maculata	MAL-02907	L-21216	LYPAP907-09	El Colegio de la Frontera Sur	Mexico	Quintana Roo	Yes	1	GU659402
Marpesia chironECO01	MAL-02917	L-44843	LYPAP917-09	El Colegio de la Frontera Sur	Mexico	Campeche	Yes	1	GU659395
Marpesia chironECO02	MAL-02923	L-11706	LYPAP923-09	El Colegio de la Frontera Sur	Mexico	Campeche	Yes	1	GU659385
Marpesia chironECO02	MAL-02922	L-21134	LYPAP922-09	El Colegio de la Frontera Sur	Mexico	Quintana Roo	Yes	1	GU659392
Marpesia chironECO02	MAL-02921	L-26490	LYPAP921-09	El Colegio de la Frontera Sur	Mexico	Campeche	Yes	1	GU659391
Marpesia chironECO02	MAL-02920	L-28581	LYPAP920-09	El Colegio de la Frontera Sur	Mexico	Campeche	Yes	1	GU659390
Marpesia chironECO02	MAL-02919	L-42163	LYPAP919-09	El Colegio de la Frontera Sur	Mexico	Quintana Roo	Yes	1	GU659389
Marpesia chironECO02	MAL-02918	L-30787	LYPAP918-09	El Colegio de la Frontera Sur	Mexico	Campeche	Yes	1	GU659396
Marpesia chironECO02	MAL-02916	L-75594	LYPAP916-09	El Colegio de la Frontera Sur	Mexico	Quintana Roo	Yes	1	GU659394
Marpesia chironECO02	MAL-02915	L-69696	LYPAP915-09	El Colegio de la Frontera Sur	Mexico	Quintana Roo	Yes	1	GU659393
Marpesia chironECO02	MAL-02914	L-59008	LYPAP914-09	El Colegio de la Frontera Sur	Mexico	Quintana Roo	Yes	1	GU659400
Marpesia chironECO02	MAL-02913	L-65768	LYPAP913-09	El Colegio de la Frontera Sur	Mexico	Campeche	Yes	1	GU659399
Marpesia chironECO02	MAL-02912	L-86612	LYPAP912-09	El Colegio de la Frontera Sur	Mexico	Yucatan	Yes	1	GU659398
Marpesia chironECO02	MAL-02911	L-70254	LYPAP911-09	El Colegio de la Frontera Sur	Mexico	Yucatan	Yes	1	GU659397
Marpesia petreus	MAL-02935	L-70078	LYPAP935-09	El Colegio de la Frontera Sur	Mexico	Yucatan	Yes	1	GU659380
Marpesia petreus	MAL-02934	L-28579	LYPAP934-09	El Colegio de la Frontera Sur	Mexico	Campeche	Yes	1	JN201294
Marpesia petreus	MAL-02933	L-42162	LYPAP933-09	El Colegio de la Frontera Sur	Mexico	Campeche	Yes	1	GU659379
Marpesia petreus	MAL-02932	L-32153	LYPAP932-09	El Colegio de la Frontera Sur	Mexico	Campeche	Yes	1	GU659378
Marpesia petreus	MAL-02931	L-85064	LYPAP931-09	El Colegio de la Frontera Sur	Mexico	Quintana Roo	Yes	1	GU659377
Marpesia petreus	MAL-02930	L-87207	LYPAP930-09	El Colegio de la Frontera Sur	Mexico	Yucatan	Yes	1	GU659384
Marpesia petreus	MAL-02929	L-43818	LYPAP929-09	El Colegio de la Frontera Sur	Mexico	Quintana Roo	Yes	1	GU659383
Marpesia petreus	MAL-02928	L-28567	LYPAP928-09	El Colegio de la Frontera Sur	Mexico	Campeche	Yes	1	GU659382
Marpesia petreus	MAL-02927	L-65791	LYPAP927-09	El Colegio de la Frontera Sur	Mexico	Campeche	Yes	1	GU659381
Marpesia petreus	MAL-02926	L-24814	LYPAP926-09	El Colegio de la Frontera Sur	Mexico	Campeche	Yes	1	GU659388
Marpesia petreus	MAL-02925	L-87214	LYPAP925-09	El Colegio de la Frontera Sur	Mexico	Yucatan	Yes	1	GU659387
Marpesia petreus	MAL-02924	L-87213	LYPAP924-09	El Colegio de la Frontera Sur	Mexico	Yucatan	Yes	1	GU659386
Marpesia petreus	MLL-02200	DNA-02258	LPYPC076-08	El Colegio de la Frontera Sur	Mexico	Yucatan	Yes	3	JN201295
Mechanitis lysimnia	MAL-02938	L-27296	LYPAP938-09	El Colegio de la Frontera Sur	Mexico	Campeche	Yes	1	GU659375
Mechanitis polymnia	MAL-02939	L-27295	LYPAP939-09	El Colegio de la Frontera Sur	Mexico	Campeche	Yes	1	GU659376
Mechanitis polymnia	MAL-02936	L-40319	LYPAP936-09	El Colegio de la Frontera Sur	Mexico	Campeche	Yes	1	GU659373
Memphis artacaena	MAL-02940	L-21489	LYPAP940-09	El Colegio de la Frontera Sur	Mexico	Campeche	Yes	1	GU659372
Memphis artacaena	MAL-02943	L-21508	LYNYM379-09	El Colegio de la Frontera Sur	Mexico	Campeche	Yes	1	GU659105
Memphis artacaena	MAL-02942	L-21676	LYNYM378-09	El Colegio de la Frontera Sur	Mexico	Campeche	Yes	1	GU659104
Memphis artacaena	MAL-02941	L-13880	LYNYM377-09	El Colegio de la Frontera Sur	Mexico	Campeche	Yes	1	GU659103
Memphis forreri	MAL-02953	L-29553	LYNYM389-09	El Colegio de la Frontera Sur	Mexico	Campeche	Yes	1	GU659092
Memphis forreri	MAL-02952	L-29555	LYNYM388-09	El Colegio de la Frontera Sur	Mexico	Campeche	Yes	1	GU659091
Memphis forreri	MAL-02950	L-23773	LYNYM386-09	El Colegio de la Frontera Sur	Mexico	Campeche	Yes	1	GU659096
Memphis forreri	MAL-02949	L-59336	LYNYM385-09	El Colegio de la Frontera Sur	Mexico	Quintana Roo	Yes	1	GU659095
Memphis forreri	MAL-02948	L-77245	LYNYM384-09	El Colegio de la Frontera Sur	Mexico	Quintana Roo	Yes	1	GU659094
Memphis forreri	MAL-02947	L-85867	LYNYM383-09	El Colegio de la Frontera Sur	Mexico	Yucatan	Yes	1	GU659101
Memphis forreri	MAL-02946	L-85861	LYNYM382-09	El Colegio de la Frontera Sur	Mexico	Yucatan	Yes	1	GU659100
Memphis forreri	MAL-02945	L-85859	LYNYM381-09	El Colegio de la Frontera Sur	Mexico	Yucatan	Yes	1	GU659099
Memphis forreri	MAL-02944	L-60290	LYNYM380-09	El Colegio de la Frontera Sur	Mexico	Campeche	Yes	1	GU659098
Memphis forreri	MAL-02966	L-76654	LYNYM402-09	El Colegio de la Frontera Sur	Mexico	Campeche	Yes	1	GU659081
Memphis forreri	MAL-02954	L-29551	LYNYM390-09	El Colegio de la Frontera Sur	Mexico	Campeche	Yes	1	GU659093
Memphis forreri	MLL-02150	DNA-02206	LPYPC026-08	El Colegio de la Frontera Sur	Mexico	Campeche	Yes	1	JN201296
Memphis forreri	MLL-00752	DNA-00785	LPYPC267-08	El Colegio de la Frontera Sur	Mexico	Campeche	Yes	1	JN201297
Memphis forreri	MLL-00615	DNA-00633	LPYPC093-08	El Colegio de la Frontera Sur	Mexico	Campeche	Yes	1	JN201298
Memphis forreri	MLL-00604	DNA-00622	LPYPC331-08	El Colegio de la Frontera Sur	Mexico	Campeche	Yes	0	JN201299
Memphis forreri	MLL-00592	DNA-00608	LPYPC332-08	El Colegio de la Frontera Sur	Mexico	Campeche	Yes	1	JN201300
Memphis forreri	MLL-01308	DNA-01350	LPMX650-08	El Colegio de la Frontera Sur	Mexico	Campeche	Yes	1	JN201301
Memphis forreri	MLL-01271	DNA-01313	LPMX613-08	El Colegio de la Frontera Sur	Mexico	Campeche	Yes	1	JN201302
Memphis forreri	MLL-00482	DNA-00478	LPMX482-07	El Colegio de la Frontera Sur	Mexico	Campeche	Yes	3	JN201303
Memphis forreri	MLL-00481	DNA-00477	LPMX481-07	El Colegio de la Frontera Sur	Mexico	Campeche	Yes	3	JN201304
Memphis forreri	MLL-00070	DNA-00047	LPMX070-07	El Colegio de la Frontera Sur	Mexico	Campeche	Yes	1	JN201305
Memphis forreri	MLL-00041	DNA-00066	LPMX041-07	El Colegio de la Frontera Sur	Mexico	Campeche	Yes	1	JN201306
Memphis forreri	MLL-00029	DNA-00017	LPMX029-07	El Colegio de la Frontera Sur	Mexico	Campeche	Yes	2	JN201307
Memphis forreri	MLL-00017	DNA-00019	LPMX017-07	El Colegio de la Frontera Sur	Mexico	Campeche	Yes	1	JN201308
Memphis hedemanni	MAL-02962	L-23298	LYNYM398-09	El Colegio de la Frontera Sur	Mexico	Campeche	Yes	1	GU659085
Memphis hedemanni	MAL-02961	L-29628	LYNYM397-09	El Colegio de la Frontera Sur	Mexico	Campeche	Yes	1	GU659084
Memphis hedemanni	MAL-02960	L-29627	LYNYM396-09	El Colegio de la Frontera Sur	Mexico	Campeche	Yes	1	GU659083
Memphis hedemanni	MAL-02959	L-46659	LYNYM395-09	El Colegio de la Frontera Sur	Mexico	Campeche	Yes	1	GU659090
Memphis hedemanni	MAL-02958	L-59441	LYNYM394-09	El Colegio de la Frontera Sur	Mexico	Quintana Roo	Yes	1	GU659089
Memphis hedemanni	MAL-02957	L-46397	LYNYM393-09	El Colegio de la Frontera Sur	Mexico	Campeche	Yes	1	GU659088
Memphis hedemanni	MAL-02956	L-61130	LYNYM392-09	El Colegio de la Frontera Sur	Mexico	Campeche	Yes	1	GU659087
Memphis hedemanni	MAL-02955	L-11503	LYNYM391-09	El Colegio de la Frontera Sur	Mexico	Campeche	Yes	1	HM890800
Memphis moruus	MAL-02977	L-19567	LYNYM413-09	El Colegio de la Frontera Sur	Mexico	Campeche	Yes	1	GU659068
Memphis moruus	MAL-02976	L-21473	LYNYM412-09	El Colegio de la Frontera Sur	Mexico	Campeche	Yes	1	GU659067
Memphis moruus	MAL-02975	L-21286	LYNYM411-09	El Colegio de la Frontera Sur	Mexico	Campeche	Yes	1	GU659074
Memphis moruus	MAL-02974	L-17380	LYNYM410-09	El Colegio de la Frontera Sur	Mexico	Campeche	Yes	1	GU659073
Memphis moruus	MAL-02973	L-85134	LYNYM409-09	El Colegio de la Frontera Sur	Mexico	Quintana Roo	Yes	1	GU659072
Memphis moruus	MAL-02972	L-29573	LYNYM408-09	El Colegio de la Frontera Sur	Mexico	Campeche	Yes	1	GU659071
Memphis moruus	MAL-02971	L-29589	LYNYM407-09	El Colegio de la Frontera Sur	Mexico	Campeche	Yes	1	GU659078
Memphis moruus	MAL-02970	L-29590	LYNYM406-09	El Colegio de la Frontera Sur	Mexico	Campeche	Yes	1	GU659077
Memphis moruus	MAL-02969	L-29601	LYNYM405-09	El Colegio de la Frontera Sur	Mexico	Campeche	Yes	1	GU659076
Memphis moruus	MAL-02968	L-42100	LYNYM404-09	El Colegio de la Frontera Sur	Mexico	Quintana Roo	Yes	1	GU659075
Memphis moruus	MAL-02967	L-44330	LYNYM403-09	El Colegio de la Frontera Sur	Mexico	Quintana Roo	Yes	1	GU659082
Memphis moruus	MAL-02965	L-85133	LYNYM401-09	El Colegio de la Frontera Sur	Mexico	Quintana Roo	Yes	1	GU659080
Memphis moruus	MAL-02964	L-59326	LYNYM400-09	El Colegio de la Frontera Sur	Mexico	Quintana Roo	Yes	1	GU659079
Memphis moruus	MAL-02963	L-65734	LYNYM399-09	El Colegio de la Frontera Sur	Mexico	Campeche	Yes	1	GU659086
Memphis moruus	MAL-02951	L-43167	LYNYM387-09	El Colegio de la Frontera Sur	Mexico	Quintana Roo	Yes	1	GU659097
Memphis moruus	MLL-00349	DNA-00342	LPMX349-07	El Colegio de la Frontera Sur	Mexico	Campeche	Yes	3	JN201309
Memphis moruus	MLL-00333	DNA-00326	LPMX333-07	El Colegio de la Frontera Sur	Mexico	Campeche	Yes	2	JN201310
Memphis moruus	MLL-00158	DNA-00148	LPMX158-07	El Colegio de la Frontera Sur	Mexico	Campeche	Yes	3	JN201311
Memphis moruus	MLL-00132	DNA-00117	LPMX132-07	El Colegio de la Frontera Sur	Mexico	Campeche	Yes	2	JN201312
Memphis moruus	MLL-00131	DNA-00116	LPMX131-07	El Colegio de la Frontera Sur	Mexico	Campeche	Yes	3	JN201313
Memphis moruus	MLL-00130	DNA-00115	LPMX130-07	El Colegio de la Frontera Sur	Mexico	Campeche	Yes	2	JN201314
Memphis philumena	MAL-02978	L-42105	LYNYM414-09	El Colegio de la Frontera Sur	Mexico	Quintana Roo	Yes	1	HM388486
Memphis pithyusa	MAL-02992	L-85778	LYNYM428-09	El Colegio de la Frontera Sur	Mexico	Yucatan	Yes	1	GU659058
Memphis pithyusa	MAL-02991	L-85756	LYNYM427-09	El Colegio de la Frontera Sur	Mexico	Yucatan	Yes	1	GU659057
Memphis pithyusa	MAL-02990	L-85781	LYNYM426-09	El Colegio de la Frontera Sur	Mexico	Yucatan	Yes	1	GU659056
Memphis pithyusa	MAL-02989	L-43159	LYNYM425-09	El Colegio de la Frontera Sur	Mexico	Quintana Roo	Yes	1	GU659055
Memphis pithyusa	MAL-02988	L-44477	LYNYM424-09	El Colegio de la Frontera Sur	Mexico	Campeche	Yes	1	GU659062
Memphis pithyusa	MAL-02987	L-75939	LYNYM423-09	El Colegio de la Frontera Sur	Mexico	Quintana Roo	Yes	1	GU659061
Memphis pithyusa	MAL-02986	L-75919	LYNYM422-09	El Colegio de la Frontera Sur	Mexico	Quintana Roo	Yes	1	GU659060
Memphis pithyusa	MAL-02985	L-59056	LYNYM421-09	El Colegio de la Frontera Sur	Mexico	Quintana Roo	Yes	1	GU659059
Memphis pithyusa	MAL-02984	L-68465	LYNYM420-09	El Colegio de la Frontera Sur	Mexico	Quintana Roo	Yes	1	GU659066
Memphis pithyusa	MAL-02983	L-18933	LYNYM419-09	El Colegio de la Frontera Sur	Mexico	Campeche	Yes	1	GU659065
Memphis pithyusa	MAL-02982	L-29661	LYNYM418-09	El Colegio de la Frontera Sur	Mexico	Campeche	Yes	1	GU659064
Memphis pithyusa	MAL-02981	L-65750	LYNYM417-09	El Colegio de la Frontera Sur	Mexico	Campeche	Yes	1	GU659063
Memphis pithyusa	MAL-02980	L-29679	LYNYM416-09	El Colegio de la Frontera Sur	Mexico	Campeche	Yes	1	GU659070
Memphis pithyusa	MAL-02979	L-29680	LYNYM415-09	El Colegio de la Frontera Sur	Mexico	Campeche	Yes	1	GU659069
Memphis pithyusa	MLL-01117	DNA-01159	LPYPB369-08	El Colegio de la Frontera Sur	Mexico	Campeche	Yes	1	JN201315
Memphis pithyusa	MLL-02012	DNA-02067	LPYPB700-08	El Colegio de la Frontera Sur	Mexico	Campeche	Yes	2	JN201316
Memphis pithyusa	MLL-01427	DNA-01475	LPMX769-08	El Colegio de la Frontera Sur	Mexico	Campeche	Yes	2	JN201317
Memphis pithyusa	MLL-01402	DNA-01450	LPMX744-08	El Colegio de la Frontera Sur	Mexico	Campeche	Yes	3	JN201318
Memphis pithyusa	MLL-01284	DNA-01326	LPMX626-08	El Colegio de la Frontera Sur	Mexico	Campeche	Yes	1	JN201319
Memphis pithyusa	MLL-01283	DNA-01325	LPMX625-08	El Colegio de la Frontera Sur	Mexico	Campeche	Yes	1	JN201320
Memphis pithyusa	MLL-00187	DNA-00177	LPMX187-07	El Colegio de la Frontera Sur	Mexico	Campeche	Yes	2	JN201321
Memphis pithyusa	MLL-00057	DNA-00084	LPMX057-07	El Colegio de la Frontera Sur	Mexico	Campeche	Yes	2	JN201322
Memphis pithyusa	MLL-00048	DNA-00065	LPMX048-07	El Colegio de la Frontera Sur	Mexico	Campeche	Yes	1	JN201323
Memphis pithyusa	MLL-00042	DNA-00067	LPMX042-07	El Colegio de la Frontera Sur	Mexico	Campeche	Yes	2	JN201324
Mestra dorcas	MAL-04005	L-86510	LYNYM441-09	El Colegio de la Frontera Sur	Mexico	Yucatan	Yes	1	GU659039
Mestra dorcas	MAL-04004	L-87496	LYNYM440-09	El Colegio de la Frontera Sur	Mexico	Yucatan	Yes	1	GU659046
Mestra dorcas	MAL-04003	L-65757	LYNYM439-09	El Colegio de la Frontera Sur	Mexico	Campeche	Yes	1	GU659045
Mestra dorcas	MAL-04002	L-20369	LYNYM438-09	El Colegio de la Frontera Sur	Mexico	Quintana Roo	Yes	1	GU659044
Mestra dorcas	MAL-04001	L-28663	LYNYM437-09	El Colegio de la Frontera Sur	Mexico	Campeche	Yes	1	GU659043
Mestra dorcas	MAL-03000	L-56982	LYNYM436-09	El Colegio de la Frontera Sur	Mexico	Campeche	Yes	1	GU659050
Mestra dorcas	MAL-02999	L-76452	LYNYM435-09	El Colegio de la Frontera Sur	Mexico	Campeche	Yes	1	GU659049
Mestra dorcas	MAL-02998	L-32177	LYNYM434-09	El Colegio de la Frontera Sur	Mexico	Campeche	Yes	1	GU659048
Mestra dorcas	MAL-02997	L-59107	LYNYM433-09	El Colegio de la Frontera Sur	Mexico	Quintana Roo	Yes	1	GU659047
Mestra dorcas	MAL-02996	L-43863	LYNYM432-09	El Colegio de la Frontera Sur	Mexico	Quintana Roo	Yes	1	GU659054
Mestra dorcas	MAL-02995	L-24968	LYNYM431-09	El Colegio de la Frontera Sur	Mexico	Campeche	Yes	1	GU659053
Mestra dorcas	MAL-02994	L-68481	LYNYM430-09	El Colegio de la Frontera Sur	Mexico	Quintana Roo	Yes	1	GU659052
Mestra dorcas	MAL-02993	L-72831	LYNYM429-09	El Colegio de la Frontera Sur	Mexico	Yucatan	Yes	1	GU659051
Microtia elva	MAL-04010	L-50305	LYNYM446-09	El Colegio de la Frontera Sur	Mexico	Campeche	Yes	1	GU659036
Microtia elva	MAL-04009	L-50306	LYNYM445-09	El Colegio de la Frontera Sur	Mexico	Campeche	Yes	1	GU659035
Microtia elva	MAL-04008	L-50311	LYNYM444-09	El Colegio de la Frontera Sur	Mexico	Campeche	Yes	1	GU659042
Microtia elva	MAL-04007	L-37332	LYNYM443-09	El Colegio de la Frontera Sur	Mexico	Campeche	Yes	1	GU659041
Microtia elva	MAL-04006	L-37317	LYNYM442-09	El Colegio de la Frontera Sur	Mexico	Campeche	Yes	1	GU659040
Morpho helenor	MAL-04026	L-86068	LYNYM462-09	El Colegio de la Frontera Sur	Mexico	Yucatan	Yes	1	HM388490
Morpho helenor	MAL-04025	L-86564	LYNYM461-09	El Colegio de la Frontera Sur	Mexico	Yucatan	Yes	1	GU659030
Morpho helenor	MAL-04024	L-86593	LYNYM460-09	El Colegio de la Frontera Sur	Mexico	Yucatan	Yes	1	GU659029
Morpho helenor	MAL-04023	L-68222	LYNYM459-09	El Colegio de la Frontera Sur	Mexico	Quintana Roo	Yes	1	GU659028
Morpho helenor	MAL-04022	L-69170	LYNYM458-09	El Colegio de la Frontera Sur	Mexico	Quintana Roo	Yes	1	GU659027
Morpho helenor	MAL-04021	L-58795	LYNYM457-09	El Colegio de la Frontera Sur	Mexico	Quintana Roo	Yes	1	GU659034
Morpho helenor	MAL-04020	L-53191	LYNYM456-09	El Colegio de la Frontera Sur	Mexico	Campeche	Yes	1	HM388489
Morpho helenor	MAL-04019	L-00747	LYNYM455-09	El Colegio de la Frontera Sur	Mexico	Quintana Roo	Yes	1	HM388488
Morpho helenor	MAL-04018	L-17174	LYNYM454-09	El Colegio de la Frontera Sur	Mexico	Campeche	Yes	1	GU659033
Morpho helenor	MAL-04017	L-21192	LYNYM453-09	El Colegio de la Frontera Sur	Mexico	Quintana Roo	Yes	1	GU659032
Morpho helenor	MAL-04016	L-25364	LYNYM452-09	El Colegio de la Frontera Sur	Mexico	Campeche	Yes	1	GU659031
Morpho helenor	MAL-04015	L-43100	LYNYM451-09	El Colegio de la Frontera Sur	Mexico	Quintana Roo	Yes	1	GU659038
Morpho helenor	MAL-04012	L-28010	LYNYM448-09	El Colegio de la Frontera Sur	Mexico	Campeche	Yes	1	HM388487
Morpho helenor	MAL-04011	L-28014	LYNYM447-09	El Colegio de la Frontera Sur	Mexico	Campeche	Yes	1	GU659037
Morpho helenor	MLL-01066	DNA-01108	LPYPB036-08	El Colegio de la Frontera Sur	Mexico	Campeche	Yes	2	JN201325
Morpho helenor	MLL-02061	DNA-02115	LPYPB937-08	El Colegio de la Frontera Sur	Mexico	Campeche	Yes	2	JN201326
Morpho helenor	MLL-01267	DNA-01309	LPMX609-08	El Colegio de la Frontera Sur	Mexico	Campeche	Yes	2	JN201327
Morpho helenor	MLL-00142	DNA-00131	LPMX142-07	El Colegio de la Frontera Sur	Mexico	Campeche	Yes	1	JN201328
Myscelia cyaniris	MAL-04036	L-86194	LYNYM472-09	El Colegio de la Frontera Sur	Mexico	Yucatan	Yes	1	GU659016
Myscelia cyaniris	MAL-04035	L-87346	LYNYM471-09	El Colegio de la Frontera Sur	Mexico	Yucatan	Yes	1	GU659015
Myscelia cyaniris	MAL-04034	L-23168	LYNYM470-09	El Colegio de la Frontera Sur	Mexico	Campeche	Yes	1	GU659022
Myscelia cyaniris	MAL-04033	L-29632	LYNYM469-09	El Colegio de la Frontera Sur	Mexico	Campeche	Yes	1	GU659021
Myscelia cyaniris	MAL-04032	L-76947	LYNYM468-09	El Colegio de la Frontera Sur	Mexico	Campeche	Yes	1	GU659020
Myscelia cyaniris	MAL-04031	L-43551	LYNYM467-09	El Colegio de la Frontera Sur	Mexico	Quintana Roo	Yes	1	GU659019
Myscelia cyaniris	MAL-04030	L-66172	LYNYM466-09	El Colegio de la Frontera Sur	Mexico	Campeche	Yes	1	GU659026
Myscelia cyaniris	MAL-04029	L-20353	LYNYM465-09	El Colegio de la Frontera Sur	Mexico	Quintana Roo	Yes	1	GU659025
Myscelia cyaniris	MAL-04028	L-22329	LYNYM464-09	El Colegio de la Frontera Sur	Mexico	Campeche	Yes	1	GU659024
Myscelia cyaniris	MAL-04027	L-19014	LYNYM463-09	El Colegio de la Frontera Sur	Mexico	Campeche	Yes	1	GU659023
Myscelia ethusa	MAL-04058	L-44211	LYNYM494-09	El Colegio de la Frontera Sur	Mexico	Quintana Roo	Yes	1	GU658998
Myscelia ethusa	MAL-04057	L-67011	LYNYM493-09	El Colegio de la Frontera Sur	Mexico	Quintana Roo	Yes	1	GU658997
Myscelia ethusa	MAL-04056	L-29633	LYNYM492-09	El Colegio de la Frontera Sur	Mexico	Campeche	Yes	1	GU658996
Myscelia ethusa	MAL-04055	L-29102	LYNYM491-09	El Colegio de la Frontera Sur	Mexico	Campeche	Yes	1	GU658995
Myscelia ethusa	MAL-04054	L-29075	LYNYM490-09	El Colegio de la Frontera Sur	Mexico	Campeche	Yes	1	GU659002
Myscelia ethusa	MAL-04053	L-24924	LYNYM489-09	El Colegio de la Frontera Sur	Mexico	Campeche	Yes	1	GU659001
Myscelia ethusa	MAL-04052	L-26650	LYNYM488-09	El Colegio de la Frontera Sur	Mexico	Campeche	Yes	1	GU659000
Myscelia ethusa	MAL-04051	L-22491	LYNYM487-09	El Colegio de la Frontera Sur	Mexico	Campeche	Yes	1	GU658999
Myscelia ethusa	MAL-04050	L-19326	LYNYM486-09	El Colegio de la Frontera Sur	Mexico	Campeche	Yes	1	GU659006
Myscelia ethusa	MAL-04049	L-18987	LYNYM485-09	El Colegio de la Frontera Sur	Mexico	Campeche	Yes	1	GU659005
Myscelia ethusa	MAL-04048	L-18988	LYNYM484-09	El Colegio de la Frontera Sur	Mexico	Campeche	Yes	1	GU659004
Myscelia ethusa	MAL-04047	L-18985	LYNYM483-09	El Colegio de la Frontera Sur	Mexico	Campeche	Yes	1	GU659003
Myscelia ethusa	MAL-04046	L-18930	LYNYM482-09	El Colegio de la Frontera Sur	Mexico	Campeche	Yes	1	GU659010
Myscelia ethusa	MAL-04045	L-18929	LYNYM481-09	El Colegio de la Frontera Sur	Mexico	Campeche	Yes	1	GU659009
Myscelia ethusa	MAL-04044	L-68454	LYNYM480-09	El Colegio de la Frontera Sur	Mexico	Quintana Roo	Yes	1	GU659008
Myscelia ethusa	MAL-04043	L-65707	LYNYM479-09	El Colegio de la Frontera Sur	Mexico	Campeche	Yes	1	GU659007
Myscelia ethusa	MAL-04042	L-86914	LYNYM478-09	El Colegio de la Frontera Sur	Mexico	Yucatan	Yes	1	GU659014
Myscelia ethusa	MAL-04041	L-86790	LYNYM477-09	El Colegio de la Frontera Sur	Mexico	Yucatan	Yes	1	GU659013
Myscelia ethusa	MAL-04040	L-44606	LYNYM476-09	El Colegio de la Frontera Sur	Mexico	Campeche	Yes	1	GU659012
Myscelia ethusa	MAL-04039	L-59013	LYNYM475-09	El Colegio de la Frontera Sur	Mexico	Quintana Roo	Yes	1	GU659011
Myscelia ethusa	MAL-04038	L-71673	LYNYM474-09	El Colegio de la Frontera Sur	Mexico	Yucatan	Yes	1	GU659018
Myscelia ethusa	MAL-04037	L-70777	LYNYM473-09	El Colegio de la Frontera Sur	Mexico	Yucatan	Yes	1	GU659017
Nessaea aglaura	MAL-04062	L-26507	LYNYM498-09	El Colegio de la Frontera Sur	Mexico	Campeche	Yes	1	GU658994
Nessaea aglaura	MAL-04061	L-42657	LYNYM497-09	El Colegio de la Frontera Sur	Mexico	Quintana Roo	Yes	1	GU658993
Nessaea aglaura	MAL-04060	L-67177	LYNYM496-09	El Colegio de la Frontera Sur	Mexico	Quintana Roo	Yes	1	GU658992
Nessaea aglaura	MAL-04059	L-59077	LYNYM495-09	El Colegio de la Frontera Sur	Mexico	Quintana Roo	Yes	1	GU658991
Nessaea aglaura	MAL-04067	L-76882	LYNYM503-09	El Colegio de la Frontera Sur	Mexico	Campeche	Yes	1	GU658983
Nessaea aglaura	MAL-04066	L-28684	LYNYM502-09	El Colegio de la Frontera Sur	Mexico	Campeche	Yes	1	GU658990
Nessaea aglaura	MAL-04065	L-28681	LYNYM501-09	El Colegio de la Frontera Sur	Mexico	Campeche	Yes	1	GU658989
Nessaea aglaura	MAL-04064	L-26678	LYNYM500-09	El Colegio de la Frontera Sur	Mexico	Campeche	Yes	1	GU658988
Nessaea aglaura	MAL-04063	L-26771	LYNYM499-09	El Colegio de la Frontera Sur	Mexico	Campeche	Yes	1	GU658987
Nica flavilla	MAL-04079	L-87345	LYNYM515-09	El Colegio de la Frontera Sur	Mexico	Yucatan	Yes	1	GU658971
Nica flavilla	MAL-04078	L-31701	LYNYM514-09	El Colegio de la Frontera Sur	Mexico	Campeche	Yes	1	GU658978
Nica flavilla	MAL-04077	L-32190	LYNYM513-09	El Colegio de la Frontera Sur	Mexico	Campeche	Yes	1	GU658977
Nica flavilla	MAL-04076	L-46587	LYNYM512-09	El Colegio de la Frontera Sur	Mexico	Campeche	Yes	1	GU658976
Nica flavilla	MAL-04075	L-41067	LYNYM511-09	El Colegio de la Frontera Sur	Mexico	Campeche	Yes	1	GU658975
Nica flavilla	MAL-04074	L-40825	LYNYM510-09	El Colegio de la Frontera Sur	Mexico	Campeche	Yes	1	GU658982
Nica flavilla	MAL-04073	L-28713	LYNYM509-09	El Colegio de la Frontera Sur	Mexico	Campeche	Yes	1	GU658981
Nica flavilla	MAL-04072	L-28712	LYNYM508-09	El Colegio de la Frontera Sur	Mexico	Campeche	Yes	1	GU658980
Nica flavilla	MAL-04071	L-28701	LYNYM507-09	El Colegio de la Frontera Sur	Mexico	Campeche	Yes	1	GU658979
Nica flavilla	MAL-04070	L-28696	LYNYM506-09	El Colegio de la Frontera Sur	Mexico	Campeche	Yes	1	GU658986
Nica flavilla	MAL-04069	L-28693	LYNYM505-09	El Colegio de la Frontera Sur	Mexico	Campeche	Yes	1	GU658985
Nica flavilla	MAL-04068	L-28685	LYNYM504-09	El Colegio de la Frontera Sur	Mexico	Campeche	Yes	1	GU658984
Oleria paula	MAL-04156	L-40680	LYNYM592-09	El Colegio de la Frontera Sur	Mexico	Campeche	Yes	1	GU658907
Opsiphanes cassina	MAL-04095	L-05798	LYNYM531-09	El Colegio de la Frontera Sur	Mexico	Quintana Roo	Yes	1	GU658955
Opsiphanes cassina	MAL-04094	L-05806	LYNYM530-09	El Colegio de la Frontera Sur	Mexico	Quintana Roo	Yes	1	GU658962
Opsiphanes cassina	MAL-04093	L-19964	LYNYM529-09	El Colegio de la Frontera Sur	Mexico	Campeche	Yes	1	GU658961
Opsiphanes cassina	MAL-04092	L-20409	LYNYM528-09	El Colegio de la Frontera Sur	Mexico	Quintana Roo	Yes	1	GU658960
Opsiphanes cassina	MAL-04091	L-21211	LYNYM527-09	El Colegio de la Frontera Sur	Mexico	Quintana Roo	Yes	1	GU658959
Opsiphanes cassina	MAL-04090	L-28931	LYNYM526-09	El Colegio de la Frontera Sur	Mexico	Campeche	Yes	1	GU658966
Opsiphanes cassina	MAL-04089	L-28935	LYNYM525-09	El Colegio de la Frontera Sur	Mexico	Campeche	Yes	1	GU658965
Opsiphanes cassina	MAL-04088	L-42018	LYNYM524-09	El Colegio de la Frontera Sur	Mexico	Quintana Roo	Yes	1	GU658964
Opsiphanes cassina	MAL-04087	L-32186	LYNYM523-09	El Colegio de la Frontera Sur	Mexico	Campeche	Yes	1	GU658963
Opsiphanes cassina	MAL-04086	L-76477	LYNYM522-09	El Colegio de la Frontera Sur	Mexico	Campeche	Yes	1	GU658970
Opsiphanes cassina	MAL-04085	L-69892	LYNYM521-09	El Colegio de la Frontera Sur	Mexico	Quintana Roo	Yes	1	GU658969
Opsiphanes cassina	MAL-04084	L-69893	LYNYM520-09	El Colegio de la Frontera Sur	Mexico	Quintana Roo	Yes	1	GU658968
Opsiphanes cassina	MAL-04083	L-85011	LYNYM519-09	El Colegio de la Frontera Sur	Mexico	Quintana Roo	Yes	1	GU658967
Opsiphanes cassina	MAL-04082	L-86328	LYNYM518-09	El Colegio de la Frontera Sur	Mexico	Yucatan	Yes	1	GU658974
Opsiphanes cassina	MAL-04081	L-86221	LYNYM517-09	El Colegio de la Frontera Sur	Mexico	Yucatan	Yes	1	GU658973
Opsiphanes cassina	MAL-04080	L-74529	LYNYM516-09	El Colegio de la Frontera Sur	Mexico	Yucatan	Yes	1	GU658972
Opsiphanes cassina	MLL-00134	DNA-00122	LPMX134-07	El Colegio de la Frontera Sur	Mexico	Campeche	Yes	1	JN201329
Opsiphanes quiteria	MAL-04103	L-43089	LYNYM539-09	El Colegio de la Frontera Sur	Mexico	Quintana Roo	Yes	1	GU658947
Opsiphanes quiteria	MAL-04107	L-05801	LYNYM543-09	El Colegio de la Frontera Sur	Mexico	Quintana Roo	Yes	1	GU658943
Opsiphanes quiteria	MAL-04106	L-09346	LYNYM542-09	El Colegio de la Frontera Sur	Mexico	Campeche	Yes	1	GU658950
Opsiphanes quiteria	MAL-04102	L-28916	LYNYM538-09	El Colegio de la Frontera Sur	Mexico	Campeche	Yes	1	GU658954
Opsiphanes quiteria	MAL-04101	L-43124	LYNYM537-09	El Colegio de la Frontera Sur	Mexico	Quintana Roo	Yes	1	GU658953
Opsiphanes quiteria	MAL-04100	L-28917	LYNYM536-09	El Colegio de la Frontera Sur	Mexico	Campeche	Yes	1	GU658952
Opsiphanes quiteria	MAL-04099	L-28920	LYNYM535-09	El Colegio de la Frontera Sur	Mexico	Campeche	Yes	1	GU658951
Opsiphanes quiteria	MAL-04098	L-16266	LYNYM534-09	El Colegio de la Frontera Sur	Mexico	Campeche	Yes	1	GU658958
Opsiphanes quiteria	MAL-04097	L-07946	LYNYM533-09	El Colegio de la Frontera Sur	Mexico	Campeche	Yes	1	GU658957
Opsiphanes quiteria	MAL-04096	L-06349	LYNYM532-09	El Colegio de la Frontera Sur	Mexico	Campeche	Yes	1	GU658956
Opsiphanes quiteria	MAL-04108	L-43086	LYNYM544-09	El Colegio de la Frontera Sur	Mexico	Quintana Roo	Yes	1	GU658944
Opsiphanes quiteria	MAL-04105	L-43093	LYNYM541-09	El Colegio de la Frontera Sur	Mexico	Quintana Roo	Yes	1	GU658949
Opsiphanes quiteria	MAL-04104	L-43091	LYNYM540-09	El Colegio de la Frontera Sur	Mexico	Campeche	Yes	1	GU658948
Opsiphanes quiteria	MLL-00152	DNA-00142	LPMX152-07	El Colegio de la Frontera Sur	Mexico	Campeche	Yes	1	JN201330
Opsiphanes quiteria	MLL-00135	DNA-00123	LPMX135-07	El Colegio de la Frontera Sur	Mexico	Campeche	Yes	1	JN201331
Opsiphanes quiteria	MLL-00116	DNA-00100	LPMX116-07	El Colegio de la Frontera Sur	Mexico	Campeche	Yes	1	JN201332
Pareuptychia metaleuca	MAL-04113	L-41141	LYNYM549-09	El Colegio de la Frontera Sur	Mexico	Campeche	Yes	1	GU658940
Pareuptychia metaleuca	MAL-04112	L-49644	LYNYM548-09	El Colegio de la Frontera Sur	Mexico	Campeche	Yes	1	HQ990148
Pareuptychia metaleuca	MAL-04111	L-49580	LYNYM547-09	El Colegio de la Frontera Sur	Mexico	Campeche	Yes	1	GU658939
Pareuptychia metaleuca	MAL-04110	L-22626	LYNYM546-09	El Colegio de la Frontera Sur	Mexico	Campeche	Yes	1	GU658946
Pareuptychia metaleuca	MAL-04109	L-25779	LYNYM545-09	El Colegio de la Frontera Sur	Mexico	Campeche	Yes	1	GU658945
Pareuptychia ocirrhoe	MAL-04120	L-35733	LYNYM556-09	El Colegio de la Frontera Sur	Mexico	Quintana Roo	Yes	1	GU658938
Pareuptychia ocirrhoe	MAL-04119	L-28975	LYNYM555-09	El Colegio de la Frontera Sur	Mexico	Campeche	Yes	1	GU658937
Pareuptychia ocirrhoe	MAL-04118	L-28980	LYNYM554-09	El Colegio de la Frontera Sur	Mexico	Campeche	Yes	1	GU658936
Pareuptychia ocirrhoe	MAL-04117	L-23221	LYNYM553-09	El Colegio de la Frontera Sur	Mexico	Campeche	Yes	1	GU658935
Pareuptychia ocirrhoe	MAL-04116	L-89024	LYNYM552-09	El Colegio de la Frontera Sur	Mexico	Quintana Roo	Yes	1	GU658942
Pareuptychia ocirrhoe	MAL-04114	L-42825	LYNYM550-09	El Colegio de la Frontera Sur	Mexico	Campeche	Yes	1	GU658941
Philaethria diatonica	MAL-04123	L-30073	LYNYM559-09	El Colegio de la Frontera Sur	Mexico	Campeche	Yes	1	GU658932
Philaethria diatonica	MAL-04122	L-40583	LYNYM558-09	El Colegio de la Frontera Sur	Mexico	Campeche	Yes	1	JN201333
Philaethria diatonica	MAL-04121	L-40183	LYNYM557-09	El Colegio de la Frontera Sur	Mexico	Campeche	Yes	1	GU658931
Phyciodes phaon	MAL-04126	L-46585	LYNYM562-09	El Colegio de la Frontera Sur	Mexico	Campeche	Yes	1	GU658927
Phyciodes phaon	MAL-04125	L-45394	LYNYM561-09	El Colegio de la Frontera Sur	Mexico	Campeche	Yes	1	GU658934
Phyciodes phaon	MAL-04124	L-09387	LYNYM560-09	El Colegio de la Frontera Sur	Mexico	Campeche	Yes	1	GU658933
Prepona laertesECO01	MAL-04139	L-85174	LYNYM575-09	El Colegio de la Frontera Sur	Mexico	Yucatan	Yes	1	GU658916
Prepona laertesECO01	MAL-04138	L-37034	LYNYM574-09	El Colegio de la Frontera Sur	Mexico	Campeche	Yes	1	GU658915
Prepona laertesECO01	MAL-04137	L-59035	LYNYM573-09	El Colegio de la Frontera Sur	Mexico	Quintana Roo	Yes	1	GU658922
Prepona laertesECO01	MAL-04136	L-59343	LYNYM572-09	El Colegio de la Frontera Sur	Mexico	Quintana Roo	Yes	1	GU658921
Prepona laertesECO01	MAL-04134	L-32162	LYNYM570-09	El Colegio de la Frontera Sur	Mexico	Campeche	Yes	1	GU658919
Prepona laertesECO01	MAL-04133	L-43062	LYNYM569-09	El Colegio de la Frontera Sur	Mexico	Campeche	Yes	1	GU658926
Prepona laertesECO01	MAL-04132	L-26648	LYNYM568-09	El Colegio de la Frontera Sur	Mexico	Campeche	Yes	1	GU658925
Prepona laertesECO01	MAL-04130	L-27960	LYNYM566-09	El Colegio de la Frontera Sur	Mexico	Campeche	Yes	1	GU658923
Prepona laertesECO01	MAL-04129	L-27943	LYNYM565-09	El Colegio de la Frontera Sur	Mexico	Campeche	Yes	1	GU658930
Prepona laertesECO01	MAL-04128	L-21157	LYNYM564-09	El Colegio de la Frontera Sur	Mexico	Quintana Roo	Yes	1	GU658929
Prepona laertesECO02	MAL-04135	L-75764	LYNYM571-09	El Colegio de la Frontera Sur	Mexico	Quintana Roo	Yes	1	GU658920
Prepona laertesECO02	MAL-04131	L-24970	LYNYM567-09	El Colegio de la Frontera Sur	Mexico	Campeche	Yes	1	GU658924
Prepona laertesECO02	MAL-04127	L-77274	LYNYM563-09	El Colegio de la Frontera Sur	Mexico	Quintana Roo	Yes	1	GU658928
Prepona pylene	MAL-04149	L-85181	LYNYM585-09	El Colegio de la Frontera Sur	Mexico	Yucatan	Yes	1	GU658909
Prepona pylene	MAL-04148	L-36222	LYNYM584-09	El Colegio de la Frontera Sur	Mexico	Campeche	Yes	1	GU658908
Prepona pylene	MAL-04147	L-27933	LYNYM583-09	El Colegio de la Frontera Sur	Mexico	Campeche	Yes	1	GU658914
Prepona pylene	MAL-04146	L-27934	LYNYM582-09	El Colegio de la Frontera Sur	Mexico	Campeche	Yes	1	GU658913
Prepona pylene	MAL-04145	L-25757	LYNYM581-09	El Colegio de la Frontera Sur	Mexico	Campeche	Yes	1	GU658912
Prepona pylene	MAL-04144	L-43063	LYNYM580-09	El Colegio de la Frontera Sur	Mexico	Quintana Roo	Yes	1	HQ990150
Prepona pylene	MAL-04143	L-75758	LYNYM579-09	El Colegio de la Frontera Sur	Mexico	Quintana Roo	Yes	1	GU658911
Prepona pylene	MAL-04142	L-67191	LYNYM578-09	El Colegio de la Frontera Sur	Mexico	Quintana Roo	Yes	1	GU658918
Prepona pylene	MAL-04141	L-59064	LYNYM577-09	El Colegio de la Frontera Sur	Mexico	Quintana Roo	Yes	1	HQ990149
Prepona pylene	MAL-04140	L-68464	LYNYM576-09	El Colegio de la Frontera Sur	Mexico	Quintana Roo	Yes	1	GU658917
Pteronymia cotytto	MAL-05001	L-29637	LYHES873-09	El Colegio de la Frontera Sur	Mexico	Campeche	Yes	1	GU657905
Pteronymia cotytto	MAL-05000	L-23894	LYHES872-09	El Colegio de la Frontera Sur	Mexico	Campeche	Yes	1	GU657904
Pteronymia cotytto	MAL-04157	L-42916	LYNYM593-09	El Colegio de la Frontera Sur	Mexico	Campeche	Yes	1	GU658900
Pteronymia cotytto	MAL-04155	L-29988	LYNYM591-09	El Colegio de la Frontera Sur	Mexico	Campeche	Yes	1	GU658906
Pteronymia cotytto	MAL-04154	L-29987	LYNYM590-09	El Colegio de la Frontera Sur	Mexico	Campeche	Yes	1	GU658905
Pteronymia cotytto	MAL-04153	L-29990	LYNYM589-09	El Colegio de la Frontera Sur	Mexico	Campeche	Yes	1	GU658904
Pteronymia cotytto	MAL-04152	L-26767	LYNYM588-09	El Colegio de la Frontera Sur	Mexico	Campeche	Yes	1	HM890801
Pteronymia cotytto	MAL-04151	L-17518	LYNYM587-09	El Colegio de la Frontera Sur	Mexico	Campeche	Yes	1	GU658910
Pyrrhogyra neaerea	MAL-04167	L-28494	LYNYM603-09	El Colegio de la Frontera Sur	Mexico	Campeche	Yes	1	GU658894
Pyrrhogyra neaerea	MAL-04166	L-28495	LYNYM602-09	El Colegio de la Frontera Sur	Mexico	Campeche	Yes	1	GU658893
Pyrrhogyra neaerea	MAL-04165	L-56408	LYNYM601-09	El Colegio de la Frontera Sur	Mexico	Campeche	Yes	1	GU658892
Pyrrhogyra neaerea	MAL-04164	L-52767	LYNYM600-09	El Colegio de la Frontera Sur	Mexico	Campeche	Yes	1	GU658899
Pyrrhogyra neaerea	MAL-04163	L-87179	LYNYM599-09	El Colegio de la Frontera Sur	Mexico	Yucatan	Yes	1	GU658898
Pyrrhogyra neaerea	MAL-04162	L-61163	LYNYM598-09	El Colegio de la Frontera Sur	Mexico	Campeche	Yes	1	GU658897
Pyrrhogyra neaerea	MAL-04161	L-45533	LYNYM597-09	El Colegio de la Frontera Sur	Mexico	Campeche	Yes	1	GU658896
Pyrrhogyra neaerea	MAL-04160	L-87175	LYNYM596-09	El Colegio de la Frontera Sur	Mexico	Yucatan	Yes	1	GU658903
Pyrrhogyra neaerea	MAL-04159	L-04260	LYNYM595-09	El Colegio de la Frontera Sur	Mexico	Quintana Roo	Yes	1	GU658902
Pyrrhogyra neaerea	MAL-04158	L-19278	LYNYM594-09	El Colegio de la Frontera Sur	Mexico	Campeche	Yes	1	GU658901
Pyrrhogyra otolais	MAL-04175	L-67071	LYNYM611-09	El Colegio de la Frontera Sur	Mexico	Quintana Roo	Yes	1	GU658885
Pyrrhogyra otolais	MAL-04174	L-38587	LYNYM610-09	El Colegio de la Frontera Sur	Mexico	Quintana Roo	Yes	1	GU658884
Pyrrhogyra otolais	MAL-04173	L-57234	LYNYM609-09	El Colegio de la Frontera Sur	Mexico	Quintana Roo	Yes	1	GU658891
Pyrrhogyra otolais	MAL-04172	L-17850	LYNYM608-09	El Colegio de la Frontera Sur	Mexico	Campeche	Yes	1	GU658890
Pyrrhogyra otolais	MAL-04171	L-01699	LYNYM607-09	El Colegio de la Frontera Sur	Mexico	Quintana Roo	Yes	1	GU658889
Pyrrhogyra otolais	MAL-04170	L-25734	LYNYM606-09	El Colegio de la Frontera Sur	Mexico	Campeche	Yes	1	GU658888
Pyrrhogyra otolais	MAL-04169	L-00092	LYNYM605-09	El Colegio de la Frontera Sur	Mexico	Quintana Roo	Yes	1	HQ990151
Pyrrhogyra otolais	MAL-04168	L-42845	LYNYM604-09	El Colegio de la Frontera Sur	Mexico	Campeche	Yes	1	GU658895
Siderone galanthis	MAL-04187	L-29825	LYNYM623-09	El Colegio de la Frontera Sur	Mexico	Campeche	Yes	1	GU658873
Siderone galanthis	MAL-04186	L-29826	LYNYM622-09	El Colegio de la Frontera Sur	Mexico	Campeche	Yes	1	GU658872
Siderone galanthis	MAL-04185	L-62195	LYNYM621-09	El Colegio de la Frontera Sur	Mexico	Campeche	Yes	1	GU658879
Siderone galanthis	MAL-04184	L-56633	LYNYM620-09	El Colegio de la Frontera Sur	Mexico	Campeche	Yes	1	GU658878
Siderone galanthis	MAL-04183	L-20455	LYNYM619-09	El Colegio de la Frontera Sur	Mexico	Quintana Roo	Yes	1	GU658877
Siderone galanthis	MAL-04182	L-43574	LYNYM618-09	El Colegio de la Frontera Sur	Mexico	Quintana Roo	Yes	1	GU658876
Siderone galanthis	MAL-04181	L-85002	LYNYM617-09	El Colegio de la Frontera Sur	Mexico	Quintana Roo	Yes	1	GU658883
Siderone galanthis	MAL-04180	L-60777	LYNYM616-09	El Colegio de la Frontera Sur	Mexico	Campeche	Yes	1	GU658882
Siderone galanthis	MAL-04179	L-85727	LYNYM615-09	El Colegio de la Frontera Sur	Mexico	Yucatan	Yes	1	GU658881
Siderone galanthis	MAL-04178	L-85748	LYNYM614-09	El Colegio de la Frontera Sur	Mexico	Yucatan	Yes	1	GU658880
Siderone galanthis	MAL-04177	L-74032	LYNYM613-09	El Colegio de la Frontera Sur	Mexico	Yucatan	Yes	1	GU658887
Siderone galanthis	MAL-04176	L-73641	LYNYM612-09	El Colegio de la Frontera Sur	Mexico	Yucatan	Yes	1	GU658886
Siproeta epaphus	MAL-04188	L-30072	LYNYM624-09	El Colegio de la Frontera Sur	Mexico	Campeche	Yes	1	HQ990152
Siproeta stelenes	MAL-04202	L-69826	LYNYM638-09	El Colegio de la Frontera Sur	Mexico	Quintana Roo	Yes	1	GU658863
Siproeta stelenes	MAL-04201	L-32160	LYNYM637-09	El Colegio de la Frontera Sur	Mexico	Campeche	Yes	1	GU658862
Siproeta stelenes	MAL-04200	L-86714	LYNYM636-09	El Colegio de la Frontera Sur	Mexico	Yucatan	Yes	1	GU658861
Siproeta stelenes	MAL-04199	L-86718	LYNYM635-09	El Colegio de la Frontera Sur	Mexico	Yucatan	Yes	1	GU658860
Siproeta stelenes	MAL-04198	L-86581	LYNYM634-09	El Colegio de la Frontera Sur	Mexico	Yucatan	Yes	1	GU658867
Siproeta stelenes	MAL-04197	L-42887	LYNYM633-09	El Colegio de la Frontera Sur	Mexico	Campeche	Yes	1	GU658866
Siproeta stelenes	MAL-04196	L-28172	LYNYM632-09	El Colegio de la Frontera Sur	Mexico	Campeche	Yes	1	GU658865
Siproeta stelenes	MAL-04195	L-28151	LYNYM631-09	El Colegio de la Frontera Sur	Mexico	Campeche	Yes	1	GU658864
Siproeta stelenes	MAL-04194	L-87246	LYNYM630-09	El Colegio de la Frontera Sur	Mexico	Yucatan	Yes	1	GU658871
Siproeta stelenes	MAL-04193	L-38218	LYNYM629-09	El Colegio de la Frontera Sur	Mexico	Quintana Roo	Yes	1	GU658870
Siproeta stelenes	MAL-04192	L-67458	LYNYM628-09	El Colegio de la Frontera Sur	Mexico	Quintana Roo	Yes	1	GU658869
Siproeta stelenes	MAL-04191	L-33979	LYNYM627-09	El Colegio de la Frontera Sur	Mexico	Quintana Roo	Yes	1	GU658868
Siproeta stelenes	MAL-04190	L-71198	LYNYM626-09	El Colegio de la Frontera Sur	Mexico	Yucatan	Yes	1	GU658875
Siproeta stelenes	MAL-04189	L-65446	LYNYM625-09	El Colegio de la Frontera Sur	Mexico	Campeche	Yes	1	GU658874
Smyrna blomfildia	MAL-04213	L-86574	LYNYM649-09	El Colegio de la Frontera Sur	Mexico	Yucatan	Yes	1	GU658850
Smyrna blomfildia	MAL-04212	L-59829	LYNYM648-09	El Colegio de la Frontera Sur	Mexico	Quintana Roo	Yes	1	GU658849
Smyrna blomfildia	MAL-04211	L-30720	LYNYM647-09	El Colegio de la Frontera Sur	Mexico	Campeche	Yes	1	GU658848
Smyrna blomfildia	MAL-04210	L-22643	LYNYM646-09	El Colegio de la Frontera Sur	Mexico	Campeche	Yes	1	GU658855
Smyrna blomfildia	MAL-04209	L-28754	LYNYM645-09	El Colegio de la Frontera Sur	Mexico	Campeche	Yes	1	GU658854
Smyrna blomfildia	MAL-04208	L-28756	LYNYM644-09	El Colegio de la Frontera Sur	Mexico	Campeche	Yes	1	GU658853
Smyrna blomfildia	MAL-04207	L-32583	LYNYM643-09	El Colegio de la Frontera Sur	Mexico	Campeche	Yes	1	GU658852
Smyrna blomfildia	MAL-04206	L-86969	LYNYM642-09	El Colegio de la Frontera Sur	Mexico	Yucatan	Yes	1	GU658859
Smyrna blomfildia	MAL-04205	L-87009	LYNYM641-09	El Colegio de la Frontera Sur	Mexico	Yucatan	Yes	1	GU658858
Smyrna blomfildia	MAL-04204	L-31167	LYNYM640-09	El Colegio de la Frontera Sur	Mexico	Campeche	Yes	1	GU658857
Smyrna blomfildia	MAL-04203	L-42301	LYNYM639-09	El Colegio de la Frontera Sur	Mexico	Quintana Roo	Yes	1	GU658856
Taygetis laches	MAL-04228	L-42325	LYNYM664-09	El Colegio de la Frontera Sur	Mexico	Campeche	Yes	1	GU658832
Taygetis laches	MAL-04227	L-21682	LYNYM663-09	El Colegio de la Frontera Sur	Mexico	Campeche	Yes	1	GU658839
Taygetis laches	MAL-04226	L-08344	LYNYM662-09	El Colegio de la Frontera Sur	Mexico	Campeche	Yes	1	GU658838
Taygetis laches	MAL-04225	L-88588	LYNYM661-09	El Colegio de la Frontera Sur	Mexico	Yucatan	Yes	1	GU658837
Taygetis laches	MAL-04224	L-86945	LYNYM660-09	El Colegio de la Frontera Sur	Mexico	Yucatan	Yes	1	GU658836
Taygetis laches	MAL-04222	L-44045	LYNYM658-09	El Colegio de la Frontera Sur	Mexico	Quintana Roo	Yes	1	GU658842
Taygetis laches	MAL-04221	L-43549	LYNYM657-09	El Colegio de la Frontera Sur	Mexico	Quintana Roo	Yes	1	GU658841
Taygetis laches	MAL-04220	L-44744	LYNYM656-09	El Colegio de la Frontera Sur	Mexico	Campeche	Yes	1	GU658840
Taygetis laches	MAL-04219	L-37514	LYNYM655-09	El Colegio de la Frontera Sur	Mexico	Campeche	Yes	1	GU658847
Taygetis mermeria	MAL-04217	L-42045	LYNYM653-09	El Colegio de la Frontera Sur	Mexico	Campeche	Yes	1	GU658846
Taygetis mermeria	MAL-04216	L-42046	LYNYM652-09	El Colegio de la Frontera Sur	Mexico	Quintana Roo	Yes	1	GU658845
Taygetis mermeria	MAL-04215	L-43147	LYNYM651-09	El Colegio de la Frontera Sur	Mexico	Campeche	Yes	1	GU658844
Taygetis mermeria	MAL-04214	L-43146	LYNYM650-09	El Colegio de la Frontera Sur	Mexico	Campeche	Yes	1	GU658851
Taygetis thamyra	MAL-04223	L-85009	LYNYM659-09	El Colegio de la Frontera Sur	Mexico	Quintana Roo	Yes	1	GU658843
Taygetis virgilia	MAL-04238	L-38333	LYNYM674-09	El Colegio de la Frontera Sur	Mexico	Quintana Roo	Yes	1	HM388491
Taygetis virgilia	MAL-04237	L-36587	LYNYM673-09	El Colegio de la Frontera Sur	Mexico	Campeche	Yes	1	GU658825
Taygetis virgilia	MAL-04236	L-69928	LYNYM672-09	El Colegio de la Frontera Sur	Mexico	Quintana Roo	Yes	1	GU658831
Taygetis virgilia	MAL-04235	L-88622	LYNYM671-09	El Colegio de la Frontera Sur	Mexico	Yucatan	Yes	1	GU658830
Taygetis virgilia	MAL-04234	L-00708	LYNYM670-09	El Colegio de la Frontera Sur	Mexico	Quintana Roo	Yes	1	GU658829
Taygetis virgilia	MAL-04233	L-43141	LYNYM669-09	El Colegio de la Frontera Sur	Mexico	Quintana Roo	Yes	1	GU658828
Taygetis virgilia	MAL-04232	L-28557	LYNYM668-09	El Colegio de la Frontera Sur	Mexico	Campeche	Yes	1	GU658835
Taygetis virgilia	MAL-04230	L-06252	LYNYM666-09	El Colegio de la Frontera Sur	Mexico	Campeche	Yes	1	GU658834
Taygetis virgilia	MAL-04229	L-06739	LYNYM665-09	El Colegio de la Frontera Sur	Mexico	Campeche	Yes	1	GU658833
Tegosa guatemalena	MAL-04239	L-02472	LYNYM675-09	El Colegio de la Frontera Sur	Mexico	Quintana Roo	Yes	1	HM431605
Temenis laothoe	MAL-04249	L-86652	LYNYM685-09	El Colegio de la Frontera Sur	Mexico	Yucatan	Yes	1	GU658819
Temenis laothoe	MAL-04248	L-28720	LYNYM684-09	El Colegio de la Frontera Sur	Mexico	Campeche	Yes	1	GU658818
Temenis laothoe	MAL-04247	L-28725	LYNYM683-09	El Colegio de la Frontera Sur	Mexico	Campeche	Yes	1	GU658817
Temenis laothoe	MAL-04246	L-75680	LYNYM682-09	El Colegio de la Frontera Sur	Mexico	Quintana Roo	Yes	1	HM388492
Temenis laothoe	MAL-04245	L-59301	LYNYM681-09	El Colegio de la Frontera Sur	Mexico	Quintana Roo	Yes	1	GU658824
Temenis laothoe	MAL-04244	L-44189	LYNYM680-09	El Colegio de la Frontera Sur	Mexico	Quintana Roo	Yes	1	GU658823
Temenis laothoe	MAL-04243	L-06637	LYNYM679-09	El Colegio de la Frontera Sur	Mexico	Campeche	Yes	1	GU658822
Temenis laothoe	MAL-04242	L-06823	LYNYM678-09	El Colegio de la Frontera Sur	Mexico	Campeche	Yes	1	GU658821
Temenis laothoe	MAL-04241	L-86841	LYNYM677-09	El Colegio de la Frontera Sur	Mexico	Yucatan	Yes	1	GU658827
Temenis laothoe	MAL-04240	L-87021	LYNYM676-09	El Colegio de la Frontera Sur	Mexico	Yucatan	Yes	1	GU658826
Tigridia acesta	MAL-04254	L-42169	LYNYM690-09	El Colegio de la Frontera Sur	Mexico	Campeche	Yes	1	GU658816
Tigridia acesta	MAL-04253	L-40356	LYNYM689-09	El Colegio de la Frontera Sur	Mexico	Campeche	Yes	1	GU658815
Tigridia acesta	MAL-04252	L-41013	LYNYM688-09	El Colegio de la Frontera Sur	Mexico	Campeche	Yes	1	GU658814
Tigridia acesta	MAL-04251	L-41011	LYNYM687-09	El Colegio de la Frontera Sur	Mexico	Quintana Roo	Yes	1	GU658813
Tigridia acesta	MAL-04250	L-41012	LYNYM686-09	El Colegio de la Frontera Sur	Mexico	Campeche	Yes	1	GU658820
Yphthimoides renata	MAL-04262	L-26530	LYNYM698-09	El Colegio de la Frontera Sur	Mexico	Campeche	Yes	1	GU658808
Yphthimoides renata	MAL-04260	L-42823	LYNYM696-09	El Colegio de la Frontera Sur	Mexico	Quintana Roo	Yes	1	GU658806
Yphthimoides renata	MAL-04259	L-30260	LYNYM695-09	El Colegio de la Frontera Sur	Mexico	Quintana Roo	Yes	1	GU658805
Yphthimoides renata	MAL-04258	L-24701	LYNYM694-09	El Colegio de la Frontera Sur	Mexico	Campeche	Yes	1	GU658812
Yphthimoides renata	MAL-04257	L-85131	LYNYM693-09	El Colegio de la Frontera Sur	Mexico	Quintana Roo	Yes	1	GU658811
Yphthimoides renata	MAL-04256	L-55680	LYNYM692-09	El Colegio de la Frontera Sur	Mexico	Campeche	Yes	1	GU658810
Yphthimoides renata	MAL-04255	L-26653	LYNYM691-09	El Colegio de la Frontera Sur	Mexico	Campeche	Yes	1	GU658809
Zaretis callidryas	MAL-04270	L-24728	LYNYM706-09	El Colegio de la Frontera Sur	Mexico	Campeche	Yes	1	GU658800
Zaretis callidryas	MAL-04269	L-22432	LYNYM705-09	El Colegio de la Frontera Sur	Mexico	Campeche	Yes	1	GU658799
Zaretis callidryas	MAL-04268	L-85145	LYNYM704-09	El Colegio de la Frontera Sur	Mexico	Quintana Roo	Yes	1	GU658798
Zaretis callidryas	MAL-04267	L-59175	LYNYM703-09	El Colegio de la Frontera Sur	Mexico	Quintana Roo	Yes	1	GU658797
Zaretis callidryas	MAL-04266	L-50781	LYNYM702-09	El Colegio de la Frontera Sur	Mexico	Campeche	Yes	1	GU658804
Zaretis callidryas	MAL-04265	L-28808	LYNYM701-09	El Colegio de la Frontera Sur	Mexico	Campeche	Yes	1	GU658803
Zaretis callidryas	MAL-04264	L-25776	LYNYM700-09	El Colegio de la Frontera Sur	Mexico	Campeche	Yes	1	GU658802
Zaretis callidryas	MAL-04263	L-69539	LYNYM699-09	El Colegio de la Frontera Sur	Mexico	Quintana Roo	Yes	1	GU658801
